1 **Title**

2 **Long-term ozone exposure associated cause-specific**  
3 **mortality risks with adjusted metrics by cohort studies:**  
4 **A systematic review and meta-analysis**

5  
6 **Authors**

7 Haitong Zhe Sun<sup>1,2</sup>, Pei Yu<sup>3</sup>, Changxin Lan<sup>4,5</sup>, Michelle Wan<sup>1</sup>, Sebastian Hickman<sup>1</sup>,  
8 Jayaprakash Murulitharan<sup>1</sup>, Huizhong Shen<sup>6</sup>, Le Yuan<sup>1</sup>, Yuming Guo<sup>3\*</sup>, Alexander  
9 T. Archibald<sup>1,7\*</sup>

10  
11 **Affiliations**

12 <sup>1</sup> Centre for Atmospheric Science, Yusuf Hamied Department of Chemistry, University of  
13 Cambridge, Cambridge CB2 1EW, United Kingdom

14 <sup>2</sup> Department of Earth Sciences, University of Cambridge, Cambridge CB2 3EQ, United  
15 Kingdom

16 <sup>3</sup> School of Public Health and Preventive Medicine, Monash University, Melbourne,  
17 Victoria 3004, Australia

18 <sup>4</sup> Institute of Reproductive and Child Health, Key Laboratory of Reproductive Health,  
19 National Health Commission of the People's Republic of China, Beijing 100191, China

20 <sup>5</sup> Department of Epidemiology and Biostatistics, School of Public Health, Peking  
21 University, Beijing 100191, China

22 <sup>6</sup> School of Environmental Science and Engineering, Southern University of Science and  
23 Technology, Shenzhen 518055, China

24 <sup>7</sup> National Centre for Atmospheric Science, Cambridge CB2 1EW, United Kingdom

25  
26 \* Correspondence to: Alexander T. Archibald ([ata27@cam.ac.uk](mailto:ata27@cam.ac.uk)) and Yuming Guo  
27 ([yuming.guo@monash.edu](mailto:yuming.guo@monash.edu))

28  
29 *main-text 6749 words + 3 tables + 6 figures*

30  
31

## 32 ABSTRACT

33 **BACKGROUND:** Long-term ozone (O<sub>3</sub>) exposure could lead to a series of non-  
34 communicable diseases and increase the mortality risks. However, cohort-based studies  
35 were still rather rare, and inconsistent exposure metrics might impair the credibility of  
36 epidemiological evidence synthesis. To provide more accurate meta-estimation, this  
37 review updated the systematic review with inclusion of recent studies and summarised  
38 the quantitative associations between O<sub>3</sub> exposure and cause-specific mortality risks  
39 based on unified exposure metrics.

40 **METHODS:** Research articles reporting relative risks between incremental long-term O<sub>3</sub>  
41 exposure and causes of mortality covering all-cause, cardiovascular diseases, respiratory  
42 diseases, chronic obstructive pulmonary disease, pneumonia, ischaemic heart diseases,  
43 ischaemic stroke, congestive heart failure, cerebrovascular diseases, and lung cancer,  
44 estimated from cohort studies were identified through systematic searches in MEDLINE,  
45 Embase and Web of Science. Cross-metric conversion factors were estimated linearly by  
46 decadal of observations during 1990-2019. The Hunter-Schmidt random effect estimator  
47 was applied to pool the relative risks.

48 **RESULTS:** A total of 25 studies involving 226,453,067 participants (14 unique cohorts  
49 covering 99,855,611 participants) were included in the systematic review. After linearly  
50 adjusting the inconsistent O<sub>3</sub> exposure metrics into congruity, the pooled relative risks  
51 (RR) associated with every 10 nmol mol<sup>-1</sup> (ppbV) incremental O<sub>3</sub> exposure, by mean of  
52 warm-season daily maximum 8-hour average metric, was: 1.014 with 95% confidence  
53 interval (CI) ranging 1.009–1.019 for all-cause mortality; 1.025 (95% CI: 1.010–1.040)  
54 for respiratory mortality; 1.056 (95% CI: 1.029–1.084) for COPD mortality; 1.019 (95%  
55 CI: 1.004–1.035) for cardiovascular mortality; and 1.096 (95% CI: 1.065–1.129) for  
56 congestive heart failure mortality. Insignificant mortality risk associations were found for  
57 ischaemic heart disease, cerebrovascular diseases and lung cancer.

58 **DISCUSSION:** This review covered up-to-date studies, expanded the O<sub>3</sub>-exposure  
59 associated mortality causes into wider range of categories, and firstly highlighted the  
60 issue of inconsistency in O<sub>3</sub> exposure metrics. Non-intercept linear regression-based  
61 cross-metric RR conversion was another innovation, but limitation lay in the observation  
62 reliance, indicating further calibration with more credible observations available. Large  
63 uncertainties in the multi-study pooled RRs would inspire more future studies to  
64 corroborate or contradict the results from this review.

65 **CONCLUSION:** Adjustment for exposure metrics laid more solid foundation for multi-  
66 study meta-analysis, and wider coverage of surface O<sub>3</sub> observations are anticipated to  
67 strengthen the cross-metric conversion in the future. Ever-growing numbers of  
68 epidemiological studies supported unneglectable cardiopulmonary hazards and all-cause  
69 mortality risks from long-term O<sub>3</sub> exposure. However, evidences on long-term O<sub>3</sub>  
70 exposure associated health effects were still scarce, and hence more relevant studies are  
71 encouraged to cover more population with regional diversity.

72 **REGISTRATION:** The review was registered in PROSPERO (CRD42021270637).

73 **FUNDING:** This study is mainly funded by UK Natural Environment Research Council,  
74 UK National Centre for Atmospheric Science, Australian Research Council and  
75 Australian National Health and Medical Research Council.

76

## 77 **Keywords**

78 *Ozone; long-term exposure; mortality; cohort; metric; respiratory; cardiovascular*

79

## 80 **Highlights**

- 81 1. *Updated evidence for O<sub>3</sub>-mortality associations from 25 cohorts has been provided.*
- 82 2. *Adjusting various O<sub>3</sub> exposure metrics can provide more accurate risk estimations.*
- 83 3. *Long-term O<sub>3</sub>-exposure was associated with increased mortality from all-causes, respiratory*  
84 *disease, COPD, cardiovascular disease and congestive heart failure.*

85

## 86 1 INTRODUCTION

87 Atmospheric ozone (O<sub>3</sub>) is a short-lived climate forcer.<sup>1</sup> Besides warming the global  
88 atmosphere, O<sub>3</sub> in the stratosphere can abate the radiation hazards from ultraviolet rays  
89 onto organisms, while O<sub>3</sub> in the ambient air is of detrimental defects on ecosystem and  
90 human health,<sup>2-4</sup> and hence health effects caused from exposure to surface O<sub>3</sub> have  
91 become a serious public concern. Short-term (i.e. hours to days) exposure to high-level  
92 O<sub>3</sub> can cause a series of acute symptoms like asthma, respiratory tract infection,  
93 myocardial infarction, and cardiac arrest;<sup>5-8</sup> and long-term (i.e. over years) exposure can  
94 lead to chronic health outcomes including but not limited to preterm delivery, stroke,  
95 chronic obstructive pulmonary diseases, and cerebrovascular diseases.<sup>9-12</sup> Long-term  
96 ambient O<sub>3</sub> exposure was estimated to be responsible for over 0.36 million premature  
97 deaths globally in 2019 according to the Global Burden of Disease (GBD) report released  
98 by the Institute for Health Metrics and Evaluation (IHME).<sup>13</sup>

99 Systematic reviews summarising the associations between the adverse health  
100 outcomes, and both the short-term and long-term O<sub>3</sub> exposures, have been performed in  
101 previous studies.<sup>14-16</sup> Studies on short-term O<sub>3</sub> exposure-induced morbidities are  
102 comparatively more abundant than the long-term O<sub>3</sub> exposure studies where the  
103 epidemiological evidences are less congruous. Some deficiencies are spotted in the two  
104 reviews for long-term O<sub>3</sub> exposure-associated mortality risk studies,<sup>15, 16</sup> the primary  
105 issue of which is the inconsistent use of various O<sub>3</sub> exposure metrics; however, no other  
106 reviews are found to remedy these flaws. As a secondary photolytic gaseous air pollutant,  
107 the warm-season and diurnal concentrations of surface O<sub>3</sub> will be much higher than cool-  
108 season and nocturnal concentrations,<sup>17, 18</sup> and thus the average and peak metrics of O<sub>3</sub>  
109 concentrations shall be of drastically different realistic implications.<sup>19</sup> Under this  
110 circumstance, directly pooling the relative risks scaled in different metrics might lead to  
111 biases.

112 Atkinson et al. (2016) explored 6 types of mortality causes, but searched the  
113 literatures only till 2015;<sup>16</sup> while Huangfu et al. (2019) updated the searches to 2018, but  
114 only 3 types of mortality causes were considered.<sup>15</sup> We thus determine to update the  
115 review on the health effects of O<sub>3</sub> to include more categories of mortalities together with  
116 covering the most recent publications. Additionally, GBD estimations ascribed long-term  
117 O<sub>3</sub>-exposure induced all-cause mortality for chronic obstructive pulmonary disease,<sup>13</sup>  
118 which might lead to underestimations without considering other causes. It is reasonable  
119 to deduce that long-term O<sub>3</sub> exposure will exacerbate the mortality of certain diseases  
120 given that the short-term exposure increases the morbidity risks of the same diseases, and

121 thus scrutinising epidemiological evidences for multiple causes of mortality will provide  
122 more credible supports to fill in this gap.

123 The primary innovation of our updated review is our taking full advantage of global  
124 systemic stationary observations to explore the feasibility of adjusting the various  
125 exposure metrics, and pooling the multi-study risks with the unified exposure metric, the  
126 mean of warm-season daily maximum 8-hour average, in response to the up-to-date  
127 suggestions from the Lancet global environmental health collaboration.<sup>20</sup> Through this  
128 updated systematic review and meta-analysis on long-term O<sub>3</sub> exposure associated cause-  
129 specific mortality risks, we aim to present and evaluate epidemiological evidences for 3  
130 major questions not fully addressed by the previous 2 reviews, as (1) which mortality  
131 causes shall be ascribed to long-term O<sub>3</sub> exposure; (2) have the risk associations changed  
132 given the latest studies with more mature research design and methodologies; and (3)  
133 how to estimate the quantities of the risk association strengths by the suggested exposure  
134 metric. Both our methods and discoveries are expected to inspire future O<sub>3</sub>-health studies,  
135 and support relevant policy-making to benefit the global population.

136

## 137 **2. METHODS**

### 138 **2.1 Search strategy**

139 We searched 3 research databases (MEDLINE, Embase, and Web of Science) from 1  
140 September, 2015 till 1 February, 2022 to finish our systematic review and meta-analysis,  
141 updated from 2 previous reviews on long-term O<sub>3</sub> exposure-associated mortality.<sup>15, 16</sup>  
142 Search terms also referred to these 2 previous systematic reviews with modifications to  
143 enhance the inclusion of potential relevant studies, as we combined the keywords  
144 relevant to the cause-specific mortalities (i.e. “mortality”, “death”, “premature death”,  
145 “all-cause”, “non-accidental”, “cardiopulmonary”, “respiratory”, “chronic obstructive  
146 pulmonary disease”, “pneumonia”, cardiovascular, “lung cancer”, “cerebrovascular”,  
147 “stroke”, “ischaemic heart disease”, “congestive heart failure”), the pollutant of research  
148 interest (i.e. “ozone”), and qualified epidemiological study types (i.e. “long-term”,  
149 “cohort study”, “prospective”, “retrospective”, “longitudinal study”). The detailed search  
150 strategies were listed in **Table S1**. Health outcomes considered in the systematic review  
151 were: mortality from (1) all causes (AC, ICD9: 001-799, ICD10: A00-R99); (2) all  
152 respiratory diseases (RESP, ICD9: 460-519, ICD10: J00-J98); (3) chronic obstructive

153 pulmonary diseases and allied conditions (COPD, ICD9: 490-496, ICD10: J19-J46); (4)  
154 all cardiovascular diseases (CVD, ICD9: 390-459, ICD10:I00-I98); (5) all  
155 cerebrovascular diseases (CEVD, ICD9: 430-438, ICD10: I60-I69); (6) ischaemic heart  
156 disease (IHD, ICD9: 410-414, ICD10: I20-I25); (7) congestive heart failure (CHF, ICD9:  
157 428, ICD10: I50); (8) ischaemic stroke (ICD9: 434, ICD10: I61-I64); (9) pneumonia  
158 (ICD9: 480-487, ICD10: J12-J18); and (10) lung cancer (LC, ICD9: 162, ICD10: C33-  
159 C34).

## 160 **2.2 Study eligibility criteria**

161 As an updated systematic review, literatures identified in the previous 2 reviews  
162 underwent examination together with the newly retrieved ones. Studies were included  
163 during screening following the criteria as: (1) the epidemiological research should be  
164 conducted based on cohorts; (2) the exposure should include O<sub>3</sub> as an individual risk  
165 factor; (3) the health outcomes should be all-cause or cause-specific deaths at individual  
166 level; (4) studies provided hazard ratio (HR), risk ratio (RR) or odds ratio (OR) and their  
167 95% confidence intervals (CIs) clearly and reported by every increase unit (e.g. 10-ppbV)  
168 of exposure concentrations, assuming linear risk relationship with adjusting key  
169 confounders; (6) the study should be published as an original research article in scholarly  
170 peer-reviewed journals in English. For articles from the same cohort, only one single  
171 study covering the widest populations and the longest follow-up period was reserved for  
172 meta-analysis, unless the subgroups of participants and study follow-up periods are  
173 clearly stated to be of mild overlapping; We followed the Preferred Reporting Items for  
174 Systematic Review and Meta-Analyses (PRISMA) guidelines to process the included  
175 studies on ambient O<sub>3</sub> exposure induced mortality.

## 176 **2.3 Study selection and scrutinisation**

177 All searched literatures were archived in Clarivate™ Analytics Endnote X9.3.1  
178 reference manager software. Two literature review investigators (HYS and CL)  
179 conducted title and abstract pre-screening independently for all web-searched records and  
180 reviewed the full text for the pre-screened studies. Disagreements were resolved by  
181 discussions with a third reviewer (PY).

## 182 **2.4 Data extraction**

183 Details from each screened-out literatures were extracted and labelled for the purpose  
184 of meta-analysis, including (1) the authors with publication year as study labels of  
185 reference; (2) basic descriptive information of the study cohort embracing the cohort  
186 name, country, follow-up periods, numbers of cases and total participants, population  
187 genders and ethnics, exposure metrics, health outcomes, and major confounders; (3) the  
188 risk association effects preferably quantified in HR (and also RR/OR as substitute  
189 choices) per unit incremental exposure with 95% confidence interval (CI).

## 190 **2.5 Study quality assessment**

191 All screened-out studies underwent quality evaluation using the Quality Assessment  
192 Tool of Observational Cohort and Cross-Sectional Studies developed by National  
193 Institute of Health (NIH) ([https://www.nhlbi.nih.gov/health-topics/study-quality-](https://www.nhlbi.nih.gov/health-topics/study-quality-assessment-tools)  
194 [assessment-tools](https://www.nhlbi.nih.gov/health-topics/study-quality-assessment-tools)), aiming to ensure the studies considered for meta-analysis are  
195 adequately reliable. The assessments were cross-validated by two authors (HZS and CL)  
196 independently, with the third author (PY) supervising any disagreements. **Table S2** listed  
197 14 assessment items assigned with 1 score for each, and the tallied scores were translated  
198 into a literature-specific rating of quality. Studies scoring full-mark 14 were categorised  
199 to be “Good”, while 10-13 as “Fair” and <10 as “Poor”.

200 Besides applying the quality assessment tool to determine which reviewed studies  
201 should be included for meta-analysis, checking the epidemiological evidence quality  
202 from the included literatures for each cause of mortality was finished through the Grading  
203 of Recommendations Assessment, Development, and Evaluation (GRADE) system<sup>21, 22</sup> to  
204 yield rating bands ranging across “high”, “moderate”, “low”, and “very low”. This  
205 grading system by default rated “high-quality” for cohort studies as the starting point of  
206 evaluation, and the rate would be downgraded by five limitations as the existence of (1)  
207 risk of bias examined by the Quality Assessment Tool (**Table S2**), (2) imprecision (i.e.  
208 studies did not report the central risk estimations with confidence intervals), (3)  
209 inconsistency (i.e. the directions of the estimated risks were controversial across studies),  
210 (4) indirectness (i.e. studies did not include the desired population, exposure, or health  
211 outcomes), and (5) publication bias (i.e. researchers tended to publish studies with  
212 positive results); and upgraded by three strengths as reporting (1) exposure-response  
213 trend, (2) residual confounding (i.e. adjusting the confounders highlighted the risks), and  
214 (3) strong associations. Publication biases were graphically presented by funnel plots,<sup>23</sup>



215 and statistically tested by trim-and-fill method.<sup>24</sup> The review was registered in  
216 PROSPERO (CRD42021270637).

## 217 **2.6 Exposure adjustment**

### 218 **2.6.1 Unit unification**

219 There were two major units used to quantify the surface O<sub>3</sub> concentrations, nmol  
220 mol<sup>-1</sup> or parts per billion by volume mixing ratio (ppbV) more frequently used by  
221 atmospheric modelling researchers,<sup>17, 18, 25</sup> and milligram per cubic metre by mass  
222 concentration (μg/m<sup>3</sup>) widely used by public health studies.<sup>12</sup> These two units are  
223 interchangeable to each other based on the ideal gas law  $PV = nRT$ , if the air  
224 temperatures (T) and pressures (P) are given, as presented in eqs 1–4.

$$225 \quad 1 \text{ ppbV } O_3 = \frac{1 \times 10^{-9} \text{ mol } O_3}{1 \text{ mol air}} \quad (\text{eq. 1})$$

$$226 \quad 1 \text{ mol air} \Leftrightarrow \frac{RT}{P} \times 1 \text{ mol (m}^3) = \frac{8.314 \text{ Pa} \cdot \text{m}^3 \cdot \text{K}^{-1} \times T}{P} \text{ (m}^3) \quad (\text{eq. 2})$$

$$227 \quad 1 \times 10^{-9} \text{ mol } O_3 \times 47.997 \text{ g} \cdot \text{mol}^{-1} = 47.997 \times 10^{-9} \text{ g } O_3 \quad (\text{eq. 3})$$

$$228 \quad 1 \text{ ppbV } O_3 = \frac{47.997 \times 10^{-9} \text{ g} \times 10^6 \mu\text{g} \cdot \text{g}^{-1} O_3}{8.314 \text{ Pa} \cdot \text{m}^3 \cdot \text{K}^{-1} \times T/P \text{ m}^3 \text{ air}} = 5.773 \times 10^{-3} \times \frac{P(\text{Pa})}{T(\text{K})} \frac{O_3}{\text{air}} \mu\text{g} \cdot \text{m}^{-3} \quad (\text{eq. 4})$$

229 Assuming T = 298.65 K (25.5°C) and P = 101.325 kPa, the ppbV-μg/m<sup>3</sup> conversion  
230 factor could be approximated as 1 ppbV ~ 1.96 μg/m<sup>3</sup>. Though the surface air  
231 temperatures and pressures would vary across seasons, such simplification was still  
232 widely used in previous studies,<sup>15, 26, 27</sup> being of more credibility for long-term surface O<sub>3</sub>  
233 studies averaging the surface air temperatures and pressures at longer periods. For  
234 example, even at very low temperature of 270 K, the conversion factor was 2.17, which  
235 corroborated the stability of linear conversion.

### 236 **2.6.2 Metric unification**

237 Surface O<sub>3</sub>, as a secondary photochemistry pollutant involving photolysis of NO<sub>2</sub> to  
238 trigger chains of radical reactions, has concentrations that will vary significantly between



239 day and night-time, and between warm and cool seasons, as discussed by numbers of  
240 studies.<sup>17, 28-31</sup> Under this circumstance, various daily metrics to quantify the surface O<sub>3</sub>  
241 concentrations emerged due to series of considerations, which however brought in more  
242 difficulties to assimilate epidemiological evidences. The previous reviews simply pooled  
243 the reported risk association strengths without adjusting the diverse metrics,<sup>15, 16</sup> which  
244 we thought was a fatal defect requiring improvements.

245 We therefore designed to update the meta-analysis by unifying the exposure metrics  
246 for pooled O<sub>3</sub> exposure-associated risks. As suggested by the U.S. EPA final report of *Air*  
247 *Quality Criteria for Ozone and Other Photochemical Oxidants*,<sup>32</sup> linear relationships  
248 were assumed to estimate the cross-metric conversion factors using long-term reliable  
249 observations as the Tropospheric Ozone Assessment Report (TOAR) archive<sup>19</sup> and China  
250 National Environmental Monitoring Centre (CNEMC, <http://www.cnemc.cn/en/>) in our  
251 review, and correlation matrix was used to validate that the presumptions of linearity  
252 were not violated. Both TOAR and CNEMC sites measured the surface O<sub>3</sub> by means of  
253 the UV absorption technique with strict quality control so as to ensure the comparability  
254 of the records across different countries and regions.<sup>33, 34</sup> We considered 6 complex  
255 metrics for mutual conversion as (1) annual mean of 24-hour daily average (ADA24), (2)  
256 6-month warm season mean of 24-hour daily average (6mDA24), (3) annual mean of  
257 daily maximum 8-hour average (ADMA8), (4) 6-month warm season mean of daily  
258 maximum 8-hour average (6mDMA8), (5) annual mean of daily maximum 1-hour  
259 average (ADMA1), and (6) 6-month warm season mean of daily maximum 1-hour  
260 average (6mDMA1). Long-term averaging-based metric conversion could smooth the  
261 temporal variations resulting from the seasonal and geographical solar radiation  
262 variabilities. The linear conversion factors ( $k$ ) were mathematically defined by eq 5, to  
263 adjust the original metric into the target one with irreducible regression errors  $\epsilon$ .

$$264 \quad C_{Adjusted} = k_{Original \rightarrow Adjusted} \times C_{Original} + \epsilon \quad (\text{eq. 5})$$

## 265 **2.7 Meta-analysis**

266 We collectively named relative risks (RR) for HR/RR/OR throughout our meta-  
267 analysis. All literature-reported RRs were converted into adjusted incremental risk ratios  
268 with a 10-ppbV O<sub>3</sub>-exposure increase by target metric (i.e. 6mDMA8 in this study),  
269 following eq 6 as shown below:

$$270 \quad RR_{Adjusted} = e^{\left( \frac{\ln RR_{Original}}{k_{Original \rightarrow Adjusted}} \right)} \quad (\text{eq. 6})$$

271 where  $\ln$  is the natural logarithm,  $RR_{Original}$  is the originally reported risk estimates  
272 scaled into 10-ppbV incremental exposure, and  $k_{Original \rightarrow Adjusted}$  is the conversion factor  
273 for metric unification. Multi-study pooled risks with 95% confidence interval (CI) were  
274 calculated from the adjusted RRs by Hunter-Schmidt random effect meta-regression  
275 estimator to correct the potential errors and biases caused from the diversity of study  
276 population and methodologies.<sup>35</sup>

277 We applied the Higgins  $I^2$  to quantify the heterogeneity across studies. The Higgins  
278 statistics  $I^2$  is defined as

$$279 \quad I^2 = \frac{Q - df}{Q} \times 100 \% \quad (\text{eq. 6})$$

280 where  $Q$  is the Cochran's non-parametric heterogeneity statistic assessing whether there  
281 are any cross-study differences in risks based on  $\chi^2$  distribution and  $df$  is the  
282 corresponding degrees of freedom.<sup>36</sup> Low  $I^2$  values indicate no important heterogeneity  
283 observed and high  $I^2$  values, especially >75%, indicate considerable heterogeneity.

284 Subgroup analyses were conducted by grouping the selected studies upon the gender,  
285 regions, O<sub>3</sub> exposure metrics, and methodological reliability of individual exposure  
286 assignment; together with the adjustment of ethnicity, body mass index (BMI), smoking  
287 history, lifestyle features, and exposure to PM<sub>2.5</sub> and NO<sub>2</sub>. Subgroups should contain at  
288 least 3 studies. Leave-one-out sensitivity analyses were also accomplished to test the  
289 robustness of synthesised overall risks by meta-analysis. All meta-analyses were  
290 performed in R 4.1.1 with packages *meta*, *metafor*, and *metainf*.

291 The most widely recognised approach to construct the integrated exposure-response  
292 (IER)<sup>37</sup> relationships required sufficient epidemiological studies to comprehensively  
293 sample the population exposure levels. However, studies on long-term O<sub>3</sub> exposure  
294 health effects were relatively limited, under which circumstance we made methodological  
295 modifications to make better use of the variabilities in exposure levels by statistically  
296 imputing the exposure distributions for each study from the provided statistics (e.g. mean,  
297 standard deviation, and percentiles) for curve fitting as elaborated in [Supplementary Text](#)  
298 [S1](#). [Supplementary Text S2](#) described the detailed procedures of exposure distribution  
299 imputations with a demonstration provided in [S3](#), through which high uncertainties were  
300 still observed in the fitted IER curves due to insufficient epidemiological evidences.

301

## 302 **3. RESULTS**

### 303 **3.1 Study characters**

304 From the 3 databases during September 2015 till February 2022, a total of 339  
305 studies (77 from MEDLINE, 102 from Embase, and 160 from Web of Science) were  
306 searched; and together with 34 additional literatures added manually from the 2 previous  
307 systematic reviews,<sup>15, 16</sup> 373 studies underwent duplication censoring, deleting 101  
308 duplicated studies. After detailed scrutinisation for 272 studies, a total of 25 studies  
309 concerning long-term O<sub>3</sub> exposure and multi-cause mortalities were finally enrolled for  
310 quality evaluation, meta-analysis and further discussions (**Figure 1**).<sup>38-62</sup> **Table 1**  
311 summarised the basic information of the 25 included studies sorted by the publication  
312 year and surname of the first author.

### 313 **3.2 Metrics and exposure assignments**

314 Our updated systematic review stressed more on the exposure metrics and  
315 methodologies to obtain O<sub>3</sub> exposure, as summarised in **Table 2**. Abbey et al. (1999),<sup>38</sup>  
316 Jerrett et al. (2013)<sup>46</sup> and Lipsett et al. (2011)<sup>43</sup> did not state the metric they used clearly,  
317 but based on comparisons between the reported surface O<sub>3</sub> concentrations and TOAR  
318 observational archives, we reasonably assumed ADA24 for the first study, and ADMA8  
319 for the rest two. Details of the metric matching were given in **Supplementary Text (S4)**.  
320 Lipfert et al. (2006)<sup>39</sup> used the highest 95<sup>th</sup> percentile by hourly resolved O<sub>3</sub>  
321 concentrations as the peak exposure metric, which was only used in this one singular  
322 study, and hence approximated to DMA1. Krewski et al. (2009)<sup>41</sup> and Smith et al.  
323 (2009)<sup>42</sup> were both studies on ACS CPS II, and thus the same exposure assignment  
324 methodologies and metrics were assumed as Jerrett et al. (2009).<sup>40</sup> Likewise, Cakmak et  
325 al. (2018)<sup>53</sup> and Weichenthal et al. (2017)<sup>52</sup> were assumed to inherit Crouse et al. (2015)<sup>48</sup>  
326 as all these 3 studies were on CANCHEC. Warm season was defined as 6 months from  
327 April to September in terms of the northern hemisphere by default, but we made no  
328 exceptions to 3 studies as Zanobetti et al. (2011)<sup>44</sup> using May to September, and Crouse  
329 et al. (2015)<sup>48</sup> and Paul et al. (2020)<sup>57</sup> using May to October, due to limited number of  
330 studies searched.

331 Across all included studies, multiple methods were applied to obtain gap-free surface  
332 O<sub>3</sub> concentrations for individual-level exposure assignment. The most basic way was the

333 nearest neighbour matching between participant residential locations and *in situ*  
334 observation sites, which were more frequently used in earlier studies.<sup>39, 40</sup> A  
335 comparatively more complicated way was statistical spatial interpolation, by inverse  
336 distance weighting<sup>46</sup> or ordinary kriging<sup>41</sup>. Full spatial coverage products, such as  
337 satellite-based remote-sensing<sup>51</sup> and chemistry transport models<sup>56</sup>, were used in some  
338 studies by supervised-learning-based data fusion techniques including but not limited to  
339 universal kriging embedded land use regression,<sup>47</sup> Bayesian hierarchical model<sup>50</sup> and  
340 ensemble learning<sup>51</sup> to enhance the spatial extrapolation accuracy, which were evaluated  
341 to be of higher credibility than the basic ones described previously. All basic  
342 interpolation methods using merely the observations were rated as “Low”; applying  
343 chemical transport model simulations without calibration from the observations as  
344 “Moderate”; linearly coupling the observations with simulations as “Good”; and multi-  
345 source data assimilation by means of more sophisticated approaches as “High”. To sum  
346 up, 8 studies were rated “High”, 5 were “Good”, 2 were “Moderate”, and 10 were “Low”.  
347 Methodological progresses with time were evident as manifested in **Table 2**, prefiguring  
348 an explosion of population-based environmental health studies in the age of big data.

349 Based on the TOAR and CNEMC *in situ* observations, the cross-metric non-intercept  
350 linear conversion factors were estimated with regression accuracies given in **Figure 2**.  
351 Synthesised from the recent relevant studies, the 6mDMA8 metric was more  
352 recommended to highlight the peak exposure; and therefore, we chose to convert the  
353 originally reported RRs uniformly into the 6mDMA8 scale as standard. The O<sub>3</sub> exposure  
354 levels by the original and unified metric were listed in **Supplementary Text S1**.  
355 Demonstrations for the conversion interpretation and procedures were presented in  
356 **Supplementary Text S5**, respectively.

### 357 **3.3 Meta-analysis results**

358 We conducted meta-analyses for long-term O<sub>3</sub> exposure-associated into 10 categories  
359 of mortalities as (1) all causes (AC), (2) all respiratory diseases (RESP), (3) chronic  
360 obstructive pulmonary diseases and allied conditions (COPD), (4) all cardiovascular  
361 diseases (CVD), (5) all cerebrovascular diseases (CEVD), (6) ischaemic heart disease  
362 (IHD), (7) congestive heart failure (CHF), and (8) lung cancer (LC), with the exposure  
363 metrics adjusted into 6mDMA8.

### 364 **3.3.1 All-cause mortality**

365 A total of 23 studies were included into O<sub>3</sub> exposure-associated all-cause mortality  
366 meta-analysis, pooling the overall risk into RR = 1.014 (95% CI: 1.009–1.019, I<sup>2</sup>: 97.8%)  
367 with every 10-ppbV incremental exposure by 6mDMA8 as presented in **Figure 3**. Sub-  
368 group meta-analysis by originally reported metrics concluded the significances of risks  
369 vary across metrics, as high-concentration highlighted metrics like 6mDMA8 were of the  
370 highest positive risk (RR = 1.022, 95% CI: 1.014–1.031) while the smoothed metric  
371 ADA24 reported negative association (RR = 0.980, 95% CI: 0.960–1.001), as shown in  
372 **Figure S1**. Grouped by study regions, significant discrepancies of the risk pattern was  
373 found (**Figure S2**), as the studies in North America revealed positive associations as RR =  
374 1.019 (95% CI: 1.014–1.024), while researches on European populations showed  
375 reversed risks as RR = 0.910 (95% CI: 0.827–1.001), though not significant. The cross-  
376 region divergences did not necessarily indicate differences in population vulnerability, as  
377 (1) less and younger study population, (2) shorter follow-up durations, and (3) use of  
378 smoothed exposure metrics for studies in Europe could all potentially obscure the  
379 potential risk associations. Subgroup analysis manifested that high inter-study  
380 heterogeneities originated from metric inconsistency, methodological reliability of  
381 individual exposure assignment, and population variabilities, as encapsulated in **Table S3**.  
382 The funnel plot was visually symmetrical (**Figure S3**), and studies reporting risks below  
383 the pooled value were even slightly more, indicating no detected severe potential  
384 publication biases.

385 No significant inter-gender differences were observed based on the limited studies  
386 reporting gender-specific risk association strengths. Further subgroup analyses were  
387 unfeasible due to the lack of reporting in the literature. Alternatively, grouped RRs were  
388 estimated based on whether the original researches had adjusted the confounding effects  
389 from ethnicity, body mass index (BMI), smoking history, lifestyle features, exposure  
390 levels of PM<sub>2.5</sub> and NO<sub>2</sub>, and no inter-group divergences were observed (**Table S3**).

### 391 **3.3.2 Respiratory mortality**

392 Meta-analysis for O<sub>3</sub> exposure-associated all respiratory mortality includes 16  
393 studies, pooling which gave the overall RR = 1.025 (95% CI: 1.010–1.040, I<sup>2</sup>: 83.9%) for  
394 every 10-ppbV incremental O<sub>3</sub> exposure by 6mDMA8 (**Figure 4**). Based on sub-group  
395 meta-analysis for different metrics (**Figure S4**), peak metrics showed more significant  
396 increasing risks than ADA24, where most of the heterogeneities were from (I<sup>2</sup> = 87.0%).  
397 Cross-metric divergences were generally higher than intra-metric discrepancies. Studies

398 on North America populations showed better homogeneity in positive risks (RR = 1.029,  
399 95% CI: 1.011–1.047,  $I^2 = 71.1\%$ , **Figure S5**) than the European cohorts, pooling from  
400 which the overall risks were congruously insignificant (RR = 0.941, 95% CI: 0.856–  
401 1.036,  $I^2 = 91.2\%$ ). For O<sub>3</sub>-COPD mortality association, the pooled RR was 1.056 (95%  
402 CI: 1.029–1.084,  $I^2 = 94.5\%$ ) for 10-ppbV incremental O<sub>3</sub> exposure by 6mDMA8 from 7  
403 studies. No apparent positive publication biases were detected for both respiratory and  
404 COPD mortalities from the funnel plot (**Figure S3**).

### 405 **3.3.3 Cardiovascular mortality**

406 A total of 15 studies were included to pool the overall O<sub>3</sub> exposure-induced CVD  
407 mortality risks as RR = 1.019 (95% CI: 1.004–1.035,  $I^2 = 97.7\%$ ) for each 10-ppbV  
408 additional O<sub>3</sub> exposure by 6mDMA8 (**Figure 5**). Given the fact that the lower bound of  
409 uncertainty interval was so close to the null hypothesis (i.e. RR = 1), the positive risk  
410 association found in this review could be controversial, and thus would require more  
411 studies to support or refute the finding. Heterogeneities ( $I^2 > 79.2\%$ ) were observed  
412 through all 3 metric-grouped studies as presented in **Figure S6**. Positive risk associations  
413 were found on 10 North American cohorts (RR = 1.036, 95% CI: 1.019–1.053) while  
414 oppositely for 5 European cohorts (RR = 0.934, 95% CI: 0.865–1.008), as shown in  
415 **Figure S7**. There was no need to be concerned with the publication bias, and no more  
416 inter-group divergences were spotted except for grouping by exposure assignment  
417 methodological credibility (**Table S3**). The pooled risk for the congestive heart failure-  
418 induced mortality from 4 studies was RR = 1.074 (95% CI: 1.054–1.093,  $I^2 = 85.8\%$ )  
419 with every 10-ppbV incremental O<sub>3</sub> exposure by 6mDMA8.

### 420 **3.3.4 Other mortality causes**

421 The other cause-specific mortality risks attributable to long-term O<sub>3</sub> exposure were  
422 not statistically significant (**Figure 6**), as IHD mortality risk pooled from 10 studies was  
423 RR = 1.012 (95% CI: 0.987–1.039,  $I^2 = 98.7\%$ ), CEVD mortality risk pooled from 6  
424 studies was RR = 0.993 (95% CI: 0.979–1.008,  $I^2 = 80.6\%$ ), and LC mortality risk pooled  
425 from 13 studies was RR = 0.966 (95% CI: 0.926–1.007,  $I^2 = 84.2\%$ ). For all 8 studied  
426 mortality causes, we also provided pooled risks by 3 more widely used metrics (i.e.  
427 6mDA24, ADMA8, and ADA24) besides 6mDMA8, as listed in **Table 3** for reference.



## 428 **3.4 Study assessment**

429 All 25 studies included into our final meta-analysis were rated to be above “Fair” (14  
430 as “Fair” and 11 as “Good”) by the Quality Assessment Tool for Observational Cohort  
431 Studies, as listed in **Table S4**. All studies well met 10 out of 14 assessment items, while 9  
432 studies did not sufficiently clarify the participant exclusion criteria; 2 re-analysis study  
433 reports did not clearly state the O<sub>3</sub> exposures;<sup>41, 42</sup> 2 studies were of relatively insufficient  
434 follow-up durations (e.g. less than 5 years) to observe the outcomes resulting from long-  
435 term exposure;<sup>45, 63</sup> and 10 studies were of methodological deficiencies in individual  
436 exposure assignment,<sup>38-46, 55</sup> most of which were conducted before 2013 when data  
437 assimilation techniques were not maturely developed to fuse observations with other full  
438 spatial coverage products such as satellite-based remote sensing and atmospheric  
439 mechanistic simulations. The satisfactory assessment results overall indicated  
440 inconspicuous risks of bias, laying the reliable foundation for meta-analyses.

441 **Tables S5** displayed GRADE epidemiological evidence assessment results for each  
442 mortality cause from all involved corresponding studies. In brief, the overall judgements  
443 for all-cause, respiratory, cardiovascular, ischaemic heart disease, congestive heart  
444 failure, and lung cancer mortality risks were “High”, while the rating for the rest 2 cause-  
445 specific mortality risks (COPD and cerebrovascular diseases) were both “Moderate”.  
446 Inconsistence of the risk directions (i.e. positive or negative associations) was the most  
447 common reason for downgrading, except for the CHF-induced mortality. There were 6  
448 studies having reported the O<sub>3</sub>-mortality exposure-response trends to support the  
449 additional risks, as an assessment upgrading item for the pooled RRs of all-cause,  
450 respiratory and cardiovascular mortality. Cakmak et al. (2018) spotted higher RRs after  
451 adjusting the confounder compared to the crude values,<sup>53</sup> which gave prominence to the  
452 positive risk associations and thus correspondingly upgraded the rating for all-cause,  
453 ischaemic heart disease, and lung cancer mortalities. No substantial positive publication  
454 biases were found based on the collected evidences.

## 455 **3.5 Sensitivity analysis**

456 Leave-one-out sensitivity analyses showed stable risk estimates as summarised in  
457 **Table S6**, except for the lung cancer mortality risks after eliminating Kazemiparkouhi et  
458 al. (2019), the only study reporting positive risk association,<sup>55</sup> while the rest 11 studies  
459 concluded insignificant risks or even protective effects. Since the metric harmonisation in  
460 our study was an innovative attempt, we provided both metric-adjusted and unadjusted



461 crude results for reference as presented in **Table 3**. The crude results were pooled from  
462 the originally reported relative risk values only unified into per 10-ppbV incremental  
463 exposure, without being transformed into any metrics for congruity. Along with the meta-  
464 analyses on all qualified studies, the relative risks were also pooled by keeping only one  
465 latest study with the largest population for each separate cohort, as summarised in **Table**  
466 **S7**. Under this circumstance, the pooled unit incremental mortality risks with every 10-  
467 ppbV incremental O<sub>3</sub> exposure by 6mMDA8 metric were RR = 1.008 (95% CI: 1.006–  
468 1.009, I<sup>2</sup> = 82.6%) for all causes, RR = 1.034 (95% CI: 1.017–1.050, I<sup>2</sup> = 81.7%) for all  
469 respiratory diseases, RR = 1.060 (95% CI: 1.040–1.080, I<sup>2</sup> = 90.2%) for COPD, RR =  
470 1.032 (95% CI: 1.010–1.055, I<sup>2</sup> = 98.2%) for all cardiovascular diseases, RR = 1.008  
471 (95% CI: 0.973–1.045, I<sup>2</sup> = 99.2%) for ischaemic heart disease, and RR = 0.966 (95% CI:  
472 0.931–1.002, I<sup>2</sup> = 83.8%) for lung cancer. Studies for mortality risks of cerebrovascular  
473 diseases and congestive heart failure were respectively conducted on different cohorts,  
474 and hence such supplementary analysis was unnecessary.

475

## 476 **4. DISCUSSION**

### 477 **4.1 Improvements as an updated review**

478 This work improves on 2 previous high-quality reviews<sup>15, 16</sup> by covering up-to-date  
479 peer-reviewed studies, and expanding the O<sub>3</sub>-exposure associated causes of mortality into  
480 wider range of categories. It is the first systematic review of the association between  
481 long-term O<sub>3</sub> exposure and cause-specific mortality highlighting the issue of inconsistent  
482 use of exposure metrics to our best knowledge. Since tropospheric O<sub>3</sub> is a photochemical  
483 pollutant which largely depends on solar radiation, the surface O<sub>3</sub> concentrations can vary  
484 drastically between day and night, as well as warmer and cooler seasons. We pointed out  
485 that a 10-ppbV increase in annual daily 24-hour average concentration (ADA24) is more  
486 constrained in magnitude than a 10-ppbV increase in warm-season daily 8-hour  
487 maximum average concentration (6mDMA8) owing to the wider variability in the range  
488 of the latter metric. Taking the observations by TOAR and CNEMC *in situ* monitoring  
489 networks during 1990-2019 as an example, the surface O<sub>3</sub> concentrations were  $27.6 \pm 6.1$   
490 (IQR: 24.1–31.0) ppbV by ADA24, while correspondingly  $53.1 \pm 10.6$  (IQR: 47.7–61.4)  
491 ppbV by 6mDMA8, which indicated a 10-ppbV change fell below the IQR by the  
492 6mDMA8, but could exceed the IQR using the ADA24 metric. This was why we believe

493 adjusting the exposure metrics was necessary for O<sub>3</sub> exposure-attributable health risk  
494 meta-analysis.

495 We also put forward a feasible approach to mutually convert the O<sub>3</sub> exposure  
496 concentrations and corresponding risk strengths in various metrics by non-intercept linear  
497 projections following the operational suggestions from EPA,<sup>32</sup> but update the linear  
498 conversion factors based on global *in situ* surface O<sub>3</sub> observations during 1990-2019. The  
499 methodological innovation took advantage of multi-dimensional information from the  
500 original studies, which could inspire further observation collections and researches for  
501 corroborations and improvements.

## 502 **4.2 Metric relevant issues**

503 Although linear coefficients were applied onto the cross-metric conversions,  
504 irreducible noises still existed given the high root mean squared errors (RMSE) as shown  
505 in **Figure 2**, which exposed the limitation of risk strength adjustment into the same  
506 exposure metric by simple linear conversion, as the actual cross-metric relationships  
507 could be way more complicated. However, there was no other way but using the linear  
508 conversion coefficients as surrogates to unify the RRs by different metric reported in  
509 original studies, and thus to avoid uncertainties brought by the conversion of metrics,  
510 using a promissory consistent exposure metric or estimating the unit excess RRs in  
511 multiple metrics would be highly advocated in future long-term O<sub>3</sub>-exposure  
512 epidemiology studies.

513 Such linear conversion of risk associations could be validated by Kazemiparkouhi et  
514 al. (2020),<sup>55</sup> where multiple metrics were applied to estimate the mortality risks. For  
515 COPD mortality, the RR was 1.072 (95% CI: 1.067–1.077) by 6mDMA1 for every 10-  
516 ppbV additional exposure; and after converting into 6mDMA8 metric using the linear  
517 coefficient 0.831 (**Figure 2**), the estimated RR was 1.087 (95% CI: 1.081–1.093), close  
518 to the literature reported 1.084 (95% CI: 1.079–1.089),<sup>55</sup> which justified our linear  
519 conversion method. Converting Cross-metric linear conversions would not change the  
520 risk association direction, but using different exposure metrics when estimating the O<sub>3</sub>-  
521 exposure attributable mortality risks could potentially cause discrepancies. For an  
522 instance, Kazemiparkouhi et al. (2020) concluded excess hazards of long-term O<sub>3</sub>  
523 exposure on all-cause mortality using 6mDMA1 and 6mDMA8 as quantitative metrics,  
524 but 6mDA24 led to a specious prevention effect (RR = 0.990, 95% CI: 0.988–0.991),  
525 which should be attributed to the existence of a theoretical exposure safety level for O<sub>3</sub>  
526 below which no negative health effects should occur. Under this circumstance, lower-  
527 level metrics (e.g. ADA24) by averaging the peak O<sub>3</sub> exposures might obscure the

528 effective doses above the threshold, and also reduce the signal-to-noise ratios, so that  
529 were of lower credibility in recognising hazardous population exposures than higher-level  
530 metrics (e.g. 6mDMA8).

531 Data mining techniques were able to realise high-accuracy predictions of surface O<sub>3</sub>  
532 concentrations, but errors were never avoidable. Carey et al. (2013) used a basic IDW  
533 spatial interpolation approach to obtain the surface O<sub>3</sub> concentrations where the R<sup>2</sup> were  
534 0.24–0.76,<sup>45</sup> while years later Di et al. (2017) applied an ensemble learning approach,  
535 achieving R<sup>2</sup> = 0.80, RMSE = 2.91 ppbV.<sup>51</sup> Carey et al. (2013) reported the IQR of O<sub>3</sub>  
536 exposure concentrations as 3.0 ppbV, which was comparable to the RMSE of Di et al.  
537 (2017).<sup>51</sup> Besides, lower R<sup>2</sup> could be accompanied with higher prediction errors, which  
538 might have concealed the highest and lowest quartiles, and led to failures in  
539 distinguishing the population-level exposures. This concern had been reflected in our  
540 subgroup meta-analysis by exposure metrics, that lower-level metrics were more inclined  
541 to report insignificant risks, which also cast sceptics on the reliability of studies covering  
542 narrow exposure variabilities. We therefore are in favour of the Lancet suggestions to use  
543 peak metrics to quantify the long-term O<sub>3</sub> exposure such as 6mDMA8, and also speak  
544 highly of the state-of-the-art data techniques to reduce errors in O<sub>3</sub> concentration  
545 prediction, so as to make a distinction between the high- and low-exposure populations.

### 546 **4.3 Pathogenesis supports**

547 Atkinson et al. (2016) concluded insignificant pooled risks for long-term O<sub>3</sub>  
548 exposure associated all-cause and respiratory mortality,<sup>16</sup> which contradicted our results.  
549 It should mainly be ascribed to the heterogeneity between the more recent studies and  
550 earlier ones. The majority of studies collected in Atkinson et al. (2016) applied primitive  
551 statistical methods (i.e. nearest neighbourhood matching, IDW and ordinary kriging  
552 interpolation) for individual exposure assignment, which might have weakened the  
553 individual-level exposure distinguishment. In addition, some studies using ADA24 as the  
554 exposure metric could have also obscured the significance of associations.<sup>43, 45, 46</sup> In  
555 contrast, studies after 2016 more frequently applied advanced numerical simulation  
556 models and data assimilation techniques to increase the precision of population exposure  
557 assessment; and most of them used 6mDMA8 metric to foreground the high exposures.<sup>50,</sup>  
558 <sup>52, 53, 55-57</sup> These recent studies stuck out the significant O<sub>3</sub>-mortality associations.

559 From another aspect, pathological mechanisms had been at least partially ascertained  
560 by laboratorial experiments. The inhaled O<sub>3</sub> could constrict the muscles in the airways  
561 leading to shortness of breath, and damage the lining with inflammation.<sup>64</sup> Long-term O<sub>3</sub>

562 exposure could increase the oxidative stress in the cardiovascular system,<sup>65</sup> and cause  
563 progressive thickening of the carotid arteries to restrict cerebral blood supply.<sup>66</sup>  
564 Additionally, strong associations had already been found between short-term O<sub>3</sub> exposure  
565 and a variety of cardiopulmonary symptoms as reported by a number of observational  
566 epidemiological studies,<sup>6</sup> which also supported the long-term exposure effects, as it was  
567 unreasonable to presume no incremental risks by long-term exposure given the verified  
568 significant short-term effects. We thus were inclined to approve of the opinion that long-  
569 term O<sub>3</sub> exposure would increase mortality risks in agreement with GBD report.<sup>20</sup>

570 To alleviate the population health loss resulting from O<sub>3</sub> exposure, the U.S. EPA  
571 appealed for optimisations in real-time accessibility of air quality index, with which  
572 residents could be able to avoid unnecessary high pollution exposure  
573 (<https://www.epa.gov/ground-level-ozone-pollution/health-effects-ozone-pollution>).  
574 Appropriate diets and supplements including carotenoids, vitamin D and vitamin E were  
575 recognised to be preventive against air pollution induced respiratory damages, which was  
576 a practical protective measure for the vulnerable.<sup>67</sup>

#### 577 **4.4 Concentration-response relationship**

578 Few studies had examined the concentration-response curves between long-term O<sub>3</sub>  
579 exposure and mortality, and thus the threshold exposure level (also known as theoretical  
580 minimum risk exposure level, TMREL) below which no adverse health effects would be  
581 assumed to occur was still controversial. For all-cause mortality, Di et al. (2017) reported  
582 a safe exposure level as 30 ppbV by 6mDA24 metric (approximately as 49.9 ppbV by  
583 6mDMA8),<sup>51</sup> while Shi et al. (2022) suggested a lower level as 40 ppbV by 6mDMA8,  
584 both estimated from the Medicare beneficiary cohort.<sup>58</sup> For respiratory mortality, Jerrett  
585 et al. (2009) tested the concentration-response relationships and estimated the threshold  
586 level as 60 ppbV by 6mDMA1 (49.9 ppbV by 6mDMA8),<sup>40</sup> while Lim et al. (2019)  
587 failed to identify a significant threshold level.<sup>56</sup> For cardiovascular mortality, Lim et al.  
588 (2019) showed no apparent health hazards below 45 ppbV by 6mDMA8,<sup>56</sup> and Paul et al.  
589 (2020) prescribed a threshold level around 35 ppbV by 6mDMA8 metric for diabetic  
590 patients.<sup>57</sup> These evidence-based threshold exposure levels were all no higher than the  
591 current standards, as 70 ppbV for daily maximum 8-hour exposure under NAAQS (The  
592 National Ambient Air Quality Standards regulated by the U.S. EPA)<sup>68</sup> and 50 ppbV by  
593 warm-season DMA8 under WHO global air quality guidelines.<sup>69</sup> However, whether the  
594 standard guidelines should be revised to be more strictly would require more further  
595 studies.

596 To synthesise epidemiological evidences, Burnett et al. (2014) developed an  
597 integrated exposure-response (IER) function-based curve-fitting method to pool the risk  
598 associations from multiple studies.<sup>37</sup> We attempted to construct the IER for long-term O<sub>3</sub>  
599 exposure associated mortalities in this review, with statistically reproduced exposure  
600 levels to enhance the curve fitting, as illustrated in [Supplementary Texts S1-S3](#). The  
601 exposure imputing had revealed high reliability, but the high uncertainties of the IER  
602 curves could still not be addressed, which should be attributed to the limited effective  
603 epidemiological evidences. Empirically, this approach would require sufficient studies to  
604 cover a wide range of exposure levels, which had been frequently adopted for particulate  
605 matter exposure researches,<sup>70-72</sup> but seldomly used for O<sub>3</sub>-health studies.<sup>20</sup> The main  
606 probable reason might be that the population long-term O<sub>3</sub> exposure levels would not be  
607 as comparably distinguishable to the particulate matters. In addition, a reasonable  
608 prescribed TMREL would be necessary to establish the IER curves,<sup>37</sup> and hence the  
609 indeterminacy of the threshold level could exacerbate the uncertainties in the estimated  
610 concentration-response relationships. Therefore, more relevant studies on long-term O<sub>3</sub>  
611 exposure associated risks are urgently appealed for, based on which discussions,  
612 optimisations, or corrections on our enhanced exposure-response curve-fitting  
613 methodologies, are encouraged.

## 614 **4.5 Hierarchical classification of diseases**

615 The causes of mortalities analysed in our study followed hierarchical subordinate  
616 relationships, as the all-cause mortality consisted of cardiovascular diseases, respiratory  
617 diseases, cancer and other causes; chronic obstructive pulmonary disease belonged to  
618 respiratory category; and ischaemic heart disease, stroke, congestive heart failure and  
619 other cerebrovascular diseases all subordinated to cardiovascular symptoms. On this  
620 occasion, estimating all O<sub>3</sub>-exposure induced mortalities could follow a bottom-up  
621 scheme by adding up subgroups of diseases. However, for the historical O<sub>3</sub>-associated  
622 mortalities, GBD attributed all O<sub>3</sub>-associated mortalities onto COPD-induced premature  
623 deaths,<sup>20</sup> which we thought were of spaces for further explorations. Long-term O<sub>3</sub>  
624 exposure had shown significant association with excess cardiovascular mortalities, and  
625 thus we should update the mortality estimations in further studies by including CVD  
626 altogether into consideration.

## 627 **4.6 Application in mortality estimations**

628 The widest applications of the estimated risk association strengths were to project  
629 how many people would be affected by long-term ambient O<sub>3</sub> exposure. For example,  
630 Malley et al. (2017) estimated 1.23 (95% UI: 0.85–1.62) million respiratory deaths  
631 attributable to O<sub>3</sub> exposure in 2010,<sup>73</sup> using the risk strength by Turner et al. (2016) as  
632 HR = 1.12 (95% UI: 1.08–1.16).<sup>50</sup> This estimation was much higher than the 2019 GBD  
633 report: 0.31 (95% UI: 0.15–0.49) million, as had been highlighted in another recent  
634 study,<sup>25</sup> which should be attributed to the use of high HR value among all included  
635 studies. We had also found some other studies using one singular HR value for  
636 population risk estimations,<sup>17, 74-77</sup> but we would still encourage further relevant studies to  
637 consider multi-study pooled RRs, which could effectively reduce the potential biases  
638 from a single study. The adaptability of the pooled RRs could be verified from the  
639 coverage of exposure levels, as the 25 studies identified in our review had embraced a  
640 wide range of exposure concentrations ([Supplementary Text S1](#)) to encompass the global  
641 surface O<sub>3</sub> variability.<sup>25</sup> On the other hand, the leave-one-out sensitivity analyses (Table  
642 S6) had revealed the robustness of the meta-analysis results when including sufficient  
643 numbers of studies, which was a circumstantial reflection for the representativeness of  
644 the synthesised risk association strengths. The annual GBD reports were also based on  
645 the generalisability presumption of the synthesised epidemiological evidences, but  
646 cohort-based researches in the unstudied regions are always appealed for to provide more  
647 convincing discoveries.

## 648 **4.7 Limitations**

649 Although the total number of studied participants for risk pooling was adequately  
650 high to ensure the statistical power, the cohort-based O<sub>3</sub>-health studies were factually rare  
651 according to our literature search, and thus long-term follow-up studies are urgently  
652 encouraged. Additionally, current literatures seldomly reported grouped RRs, which  
653 made meta-analyses by sub-categories (like gender, age, socio-economic status, smoking  
654 and alcohol history, etc.) unfeasible. Scarcity of credible evidences also restricted the  
655 effects of conventional approaches to construct exposure-response curves, and our  
656 methodological innovation would require further relevant studies for substantiation. The  
657 cross-metric linear conversion factors were estimated relying on observations from  
658 available sites, which however might not be sufficiently representative of the global  
659 residential areas, as observational sites in India, Africa, and Latin America were still  
660 sparse. With ever-increasing popularisation of the *in situ* monitoring networks, the cross-



661 metric conversion factors might need calibration with more comprehensive observations,  
662 so that the pooled RRs should also be updated accordingly.

## 663 **4.8 Further study suggestions**

664 We suggest that further environmental epidemiology studies, especially long-term O<sub>3</sub>  
665 exposure related researches, clearly report i) the methodologies to obtain ambient O<sub>3</sub>  
666 concentrations, the spatiotemporal resolution, and prediction accuracy of the database; ii)  
667 the exposure metrics used for risk estimation; and iii) the statistical distribution of the O<sub>3</sub>  
668 exposure concentrations. The data-oriented methodologies to accomplish full spatial  
669 coverage ambient air O<sub>3</sub> concentrations for individual-level exposure assignment should  
670 be transparent as the construction credibility of air pollution concentration database  
671 should also be rigorously assessed, which were the foundation of epidemiological follow-  
672 up studies. We would advocate the report of exposure metrics in future O<sub>3</sub>-health studies  
673 so as to avoid confusions when comparing the risks with literature and conducting meta-  
674 regression; and according to the recent consensus, warm-season average (6mDMA8)  
675 shall be preferred as epidemiological study metrics.<sup>19</sup> We recommend future studies  
676 estimate risks with multiple O<sub>3</sub> metrics for reference; and describing the statistical  
677 distribution of the O<sub>3</sub> exposure levels is another suggested element to assess the  
678 reliability of risk estimation models, which can also be useful in exposure-response  
679 tendency exploration. We also propose future cohort studies estimate subgroup-specific  
680 RRs which can be conducive to identify the vulnerable populations.

681 Our review highlights a deficiency existing in current environmental health research  
682 literatures, that studies on long-term O<sub>3</sub> exposure health effects are still rather rare  
683 compared to particulate matter-based studies.<sup>78</sup> Also, the meta-analysis results might be  
684 geographically-biased, since large-scale O<sub>3</sub> exposure health risk studies till 2022 did not  
685 cover Asia, Africa or Latin America regions. However, there are some thriving cohorts  
686 such as the Multi-Country Multi-City (MCC) Collaborative Research Network covering  
687 over 22 countries or regions,<sup>79</sup> and the China Kadoorie Biobank (CKB) enrolling over 0.5  
688 million people,<sup>80</sup> working on environmental exposure projects. We are optimistic that  
689 more research will come out to fill in the literature gap of multi-region population-based  
690 studies.

691



## 692 **5. CONCLUSION**

693 Our state-of-the-science systematic review has summarised cohort studies exploring  
694 the associations between long-term ambient O<sub>3</sub> exposure and multi-cause mortality risks.  
695 Current studies support O<sub>3</sub>-exposure attributable additional mortalities caused from all  
696 causes, respiratory diseases, chronic obstructive pulmonary disease, cardiovascular  
697 diseases, and congestive heart failure, but no significant mortality risks are found for  
698 ischaemic heart diseases, all-type cerebrovascular diseases, and lung cancer. Exposure  
699 metrics are crucial for health risk estimations of long-term O<sub>3</sub> exposure and meta-analysis  
700 to pool the multi-study risks, for which we develop a linear conversion approach to  
701 harmonise the different metrics. Further researches on long-term O<sub>3</sub> observations and  
702 exposure-induced mortalities are encouraged to corroborate or contradict our linear  
703 conversion factors and meta-analysis results by providing more solid evidences, so as to  
704 strengthen the O<sub>3</sub>-health literatures.

705

## 706 **Competing Interest Statement**

707 All authors declare: no support from any organisation for the submitted work; no  
708 financial relationships with any organisations that might have an interest in the submitted  
709 work in the previous three years; and no other relationships or activities that could appear  
710 to have influenced the submitted work.

## 711 **Author Contributions**

712 ATA and YG conceived the idea for the review; HZS, CL and PY performed the  
713 literature search; HZS and PY conducted statistical analyses; HZS, ATA, YG, PY, SH,  
714 JM, HS and LY contributed to discussions; HZS wrote the article; and MW examined the  
715 languages. HZS is the guarantor who accepted the full responsibility for the finished  
716 article, owned full access to all relevant data, and controlled the decision to publish. The  
717 two joint corresponding authors, ATA and YG, attests that all listed authors meet  
718 authorship criteria and that no others meeting the criteria have been omitted. The  
719 guarantor, HZS, affirms that the manuscript is an honest, accurate, and transparent  
720 account of the study being reported, and no important aspects of the study have been  
721 omitted. No ethical approval is needed for a systematic review and meta-analysis.

## 722 **Acknowledgement**

723 This study is funded by UK Natural Environment Research Council (NERC), UK  
724 National Centre for Atmospheric Science (NCAS), Australian Research Council  
725 (DP210102076) and Australian National Health and Medical Research Council  
726 (APP2000581). HZS, MW, and SH receive funding from Engineering and Physical  
727 Sciences Research Council (EPSRC) via the UK Research and Innovation (UKRI) Centre  
728 for Doctoral Training in Application of Artificial Intelligence to the study of  
729 Environmental Risks (AI4ER, EP/S022961/1). ATA acknowledges funding from NERC  
730 (NE/P016383/1) and through the Met Office UKRI Clean Air Programme. YG is  
731 supported by a Career Development Fellowship of the Australian National Health and  
732 Medical Research Council (APP1163693). All contents in this study are solely the  
733 responsibility of the grantees and do not represent the official views of the supporting  
734 agencies.

735 Special appreciations to Dr Xiao Lu (School of Atmospheric Sciences, Sun Yat-sen  
736 University) for his insightful discussion on the quality control of TOAR products, Dr  
737 Lihua Shi (Rollins School of Public Health, Emory University) for her supplementary  
738 information on Medicare beneficiary cohort information, and 4 anonymous reviewers  
739 together with the editor for their meticulous efforts in improving the manuscript.

## 740 **Data Availability**

741 The surface O<sub>3</sub> observations are archived in the Tropospheric Ozone Assessment  
742 Report (TOAR, <https://b2share.fz-juelich.de/communities/TOAR>) repository and China  
743 National Environmental Monitoring Centre (CNEMC, <http://www.cnemc.cn/en/>)  
744 repository, which are accessible to the public. The cohort-based long-term O<sub>3</sub> exposure-  
745 associated cause-specific mortality risks are all available in the main text or  
746 supplementary materials of the selected studies.

## 747 **Supplementary Information**

748 Further detailed information can be found in the **Supplementary Materials** (PDF)  
749 consisting of 25 pages with 5 sections of texts as “imputation procedures for exposure  
750 distribution” (S1), “enhanced integrated exposure-response curve-fitting” (S2),  
751 “demonstrative procedures of enhanced exposure-response trend curve-fitting” (S3),  
752 “undefined metric imputation” (S4), and “interpretation and procedure of cross-metric  
753 linear conversion” (S5), together with 6 tables and 7 figures to strengthen the results and  
754 discussions presented in the main text. A **PRISMA Checklist** (PDF) was provided to  
755 verify the integrity of this study.

756

## TABLES

**Table 1 Summary of cohort characteristics included for meta-analysis.**

| Study                                    | Cohort     | Country | Follow-up Duration | Population Type           | Sample Size | Sex | Age                  | Key Confounding Adjustment                                                                                                    | Mortality Causes                        |
|------------------------------------------|------------|---------|--------------------|---------------------------|-------------|-----|----------------------|-------------------------------------------------------------------------------------------------------------------------------|-----------------------------------------|
| Abbey et al. 1999 <sup>38</sup>          | AHS        | USA     | 1977-1992          | Occupational              | 6,182       | FM  | 27-95                | age, sex, BMI, smoking, individual demographic features <sup>l</sup> , lifestyle features <sup>+</sup> , medical history      | AC, RESP, LC                            |
| Lipfert et al. 2006 <sup>39</sup>        | WU-EPRI    | USA     | 1976-1996          | General                   | 67,108      | M   | 51 (12) <sup>§</sup> | age, ethnicity, BMI, smoking, traffic density, NO <sub>2</sub> , CO                                                           | AC                                      |
| Jerrett et al. 2009 <sup>40</sup>        | ACS CPS II | USA     | 1977-2000          | General                   | 448,850     | FM  |                      | age, sex, ethnicity, BMI, smoking, individual demographic features, lifestyle features, PM <sub>2.5</sub>                     | AC, RESP, CVD, IHD                      |
| Krewski et al. 2009 <sup>41</sup>        | ACS CPS II | USA     | 1982-2000          | General                   | 488,370     | FM  | ≥ 30                 | age, sex, ethnicity, BMI, smoking, individual demographic features, lifestyle features, PM <sub>2.5</sub>                     | AC, IHD, LC                             |
| Smith et al. 2009 <sup>42</sup>          | ACS CPS II | USA     | 1982-2000          | General                   | 352,242     | FM  |                      | age, sex, ethnicity, BMI, smoking, lifestyle features, medical treatment                                                      | AC, RESP, CVD                           |
| Lipsett et al. 2011 <sup>43</sup>        | CTS        | USA     | 1998-2005          | Occupational              | 124,614     | F   | ≥ 20                 | age, sex, ethnicity, BMI, smoking, lifestyle features, medical history                                                        | AC, RESP, CVD, IHD, CEVD, LC            |
| Zanobetti et al. 2011 <sup>44</sup>      | Medicare   | USA     | 1985-2006          | General                   | 8,894,473   | FM  | ≥ 65                 | age, sex, ethnicity, medical history                                                                                          | COPD, CHF                               |
| Carey et al. 2013 <sup>45</sup>          | CPRD       | UK      | 2003-2007          | General                   | 824,654     | FM  | 40-89                | age, sex, BMI, smoking, individual demographic features                                                                       | AC, RESP, LC                            |
| Jerrett et al. 2013 <sup>46</sup>        | ACS CPS II | USA     | 1982-2000          | General                   | 73,711      | FM  | 57 (11)              | age, sex, smoking, individual demographic features, lifestyle features                                                        | AC, RESP, CVD, IHD, LC                  |
| Bentayeb et al. 2015 <sup>47</sup>       | GAZEL      | France  | 1989-2013          | Occupational              | 20,327      | FM  | 44 (4)               | age, sex, BMI, smoking, individual demographic features, lifestyle features                                                   | AC, RESP, CVD                           |
| Crouse et al. 2015 <sup>48</sup>         | CANCHEC    | Canada  | 1991-2006          | General                   | 2,521,525   | FM  | ≥ 25                 | age, sex, individual and area-level demographic features, PM <sub>2.5</sub> , NO <sub>2</sub>                                 | AC, RESP, COPD, CVD, IHD, CEVD, LC      |
| Tonne et al. 2016 <sup>49</sup>          | MINAP      | UK      | 2003-2010          | MI Survivors <sup>†</sup> | 18,138      | FM  | 68 (14)              | age, sex, ethnicity, smoking, medical history, area-level demographic features                                                | AC                                      |
| Turner et al. 2016 <sup>50</sup>         | ACS CPS II | USA     | 1982-2004          | General                   | 669,046     | FM  | ≥ 30                 | age, sex, BMI, smoking, individual and area-level demographic features, PM <sub>2.5</sub> , NO <sub>2</sub>                   | AC, RESP, COPD, CVD, CHF, IHD, CEVD     |
| Di et al. 2017 <sup>51</sup>             | Medicare   | USA     | 2000-2012          | General                   | 60,925,443  | FM  | ≥ 65                 | age, sex, ethnicity, BMI, smoking, individual and area-level demographic features, meteorological features, PM <sub>2.5</sub> | AC                                      |
| Weichenthal et al. 2017 <sup>52</sup>    | CANCHEC    | Canada  | 2001-2011          | General                   | 2,448,500   | FM  | 25-89                | age, sex, ethnicity, individual and area-level demographic features                                                           | AC, RESP, CVD                           |
| Cakmak et al. 2018 <sup>53</sup>         | CANCHEC    | Canada  | 1991-2011          | General                   | 2,291,250   | FM  | ≥ 25                 | age, sex, individual demographic features, PM <sub>2.5</sub>                                                                  | AC, COPD, IHD, LC                       |
| Hvidtfeldt et al. 2019 <sup>54</sup>     | DDCH       | Denmark | 1993-1997          | General                   | 49,596      | FM  | 50-64                | age, sex, BMI, smoking, individual and area-level demographic features, noise                                                 | AC, RESP, CVD                           |
| Kazemiparkouhi et al. 2019 <sup>55</sup> | Medicare   | USA     | 2000-2008          | General                   | 22,159,190  | FM  | ≥ 65                 | age, sex, ethnicity, area-level demographic features, PM <sub>2.5</sub>                                                       | AC, RESP, COPD, CVD, IHD, CHF, CEVD, LC |

| Study                                | Cohort   | Country                  | Follow-up Duration | Population Type | Sample Size | Sex | Age     | Key Confounding Adjustment                                                                                                                                   | Mortality Causes                        |
|--------------------------------------|----------|--------------------------|--------------------|-----------------|-------------|-----|---------|--------------------------------------------------------------------------------------------------------------------------------------------------------------|-----------------------------------------|
| Lim et al. 2019 <sup>56</sup>        | NIH-AARP | USA                      | 1995-2011          | General         | 548,780     | FM  | 50-71   | age, sex, ethnicity, BMI, smoking, individual demographic features, PM <sub>2.5</sub> , NO <sub>2</sub> , daily maximum temperature                          | AC, RESP, COPD, CVD, IHD, CHF, CEVD, LC |
| Paul et al. 2020 <sup>57</sup>       | ONPHEC   | Canada                   | 1996-2015          | Diabetes        | 452,590     | FM  | 35-85   | age, sex, area-level demographic features                                                                                                                    | CVD                                     |
| Shi et al. 2021 <sup>58</sup>        | Medicare | USA                      | 2001-2017          | General         | 44,684,756  | FM  | ≥ 65    | age, sex, ethnicity, BMI, smoking, individual and area-level demographic features, lifestyle features, PM <sub>2.5</sub> , NO <sub>2</sub> , medical history | AC                                      |
| Strak et al. 2021 <sup>59</sup>      | ELAPSE   | 6 countries <sup>†</sup> | 1985-2015          | General         | 325,367     | FM  | 49 (13) | age, sex, ethnicity, BMI, smoking, individual and area-level demographic features, PM <sub>2.5</sub> , NO <sub>2</sub> , BC                                  | AC, RESP, COPD, CVD, IHD, CEVD          |
| Yazdi et al. 2021 <sup>60</sup>      | Medicare | USA                      | 2000-2016          | General         | 44,430,747  | FM  | ≥ 65    | age, sex, ethnicity, BMI, smoking, individual and area-level demographic features, lifestyle features, PM <sub>2.5</sub> , NO <sub>2</sub> , medical history | AC                                      |
| Bauwelinck et al. 2022 <sup>61</sup> | BC2001   | Belgium                  | 2001-2011          | General         | 5,474,470   | FM  | ≥ 30    | age, sex, individual and area-level demographic features, PM <sub>2.5</sub> , NO <sub>2</sub>                                                                | AC, RESP, CVD, LC                       |
| Stafoggia et al. 2022 <sup>62</sup>  | ELAPSE   | 7 countries <sup>‡</sup> | 2000-2017          | General         | 28,153,138  | FM  | ≥ 30    | age, sex, ethnicity, BMI, smoking, individual and area-level demographic features, PM <sub>2.5</sub> , NO <sub>2</sub> , BC                                  | AC, RESP, CVD, LC                       |

Cohort abbreviations: AHSMOG, *Adventist Health Study of Smog*; WU-EPRI, *Washington University–Electric Power Research Institute*; ACS CPS, *American Cancer Society Cancer Prevention Study*; CTS, *California Teacher Study*; CPRD, *Clinical Practice Research Datalink*; GAZEL, *GAZ de France and Électricité*; CANCHEC, *Canadian Census Health and Environment Cohort*; MINAP, *National Audit of Myocardial Infarction Project*; DDCH, *Danish Diet, Cancer and Health*; NIH-AARP, *National Institute of Health, American Association of Retired Persons*; ONPHEC, *Ontario Population Health and Environment Cohort*; BC2001, *Belgian 2001 Census*.

<sup>¶</sup> Demographic features included marital status, education attainment, employment status and occupational class, aboriginal ancestry, visible minority ethnicities, immigrant status and residence location (urban or rural), income level and socioeconomic status (SES), and regional population density. Different studies adjusted various combinations of demographic features.

<sup>±</sup> Lifestyle features included consumptions of alcohol, dietary fat, vegetables, fruits (dietary fibre), and vitamins, together with physical activity frequency. Different studies adjusted various combinations of lifestyle features.

<sup>§</sup> Population ages were reported by mean with standard deviation (in bracket).

<sup>\*</sup> MI, Myocardial Infarction.

<sup>†</sup> Sweden, Denmark, France, Netherland, Germany and Austria.

<sup>‡</sup> Belgium, Denmark, England, Netherland, Norway, Switzerland and Italy.

**Table 2 Data sources and statistical methods of O<sub>3</sub> exposure assignment.**

Methodological ratings were based on spatial interpolation and multi-data assimilation approaches. Spatial resolutions, exposure metrics, and levels of incremental risk ratio were also listed.

| Study                                    | Data Sources                                                                                                         | Methods                                            | Resolution      | Rating   | Metrics                    | Level of incremental risk ratio |
|------------------------------------------|----------------------------------------------------------------------------------------------------------------------|----------------------------------------------------|-----------------|----------|----------------------------|---------------------------------|
| Abbey et al. 1999 <sup>38</sup>          | monitoring station observations                                                                                      | IDW interpolation                                  | NR <sup>¶</sup> | Low      | ADMA8                      | 12.03 ppbV                      |
| Lipfert et al. 2006 <sup>39</sup>        | monitoring station observations                                                                                      | nearest matching (assumed) <sup>†</sup>            | NR              | Low      | ADMA1                      | 40 ppbV                         |
| Jerrett et al. 2009 <sup>40</sup>        | monitoring station observations                                                                                      | nearest matching (assumed)                         | NR              | Low      | 6mDMA1                     | 10 ppbV                         |
| Krewski et al. 2009 <sup>41</sup>        | monitoring station observations                                                                                      | ordinary kriging interpolation                     | NR              | Low      | 6mDMA1                     | 10 ppbV                         |
| Smith et al. 2009 <sup>42</sup>          | monitoring station observations                                                                                      | nearest matching (assumed)                         | NR              | Low      | 6mDMA1                     | 1 µg/m <sup>3</sup>             |
| Lipsett et al. 2011 <sup>43</sup>        | monitoring station observations                                                                                      | IDW interpolation                                  | 250 m           | Low      | ADA24                      | 22.96 ppbV                      |
| Zanobetti et al. 2011 <sup>44</sup>      | monitoring station observations                                                                                      | nearest matching (assumed)                         | NR              | Low      | 6mDMA8                     | 5 ppbV                          |
| Carey et al. 2013 <sup>45</sup>          | monitoring station observations                                                                                      | interpolation (IDW assumed)                        | 1 km            | Low      | ADA24                      | 3.0 µg/m <sup>3</sup>           |
| Jerrett et al. 2013 <sup>46</sup>        | monitoring station observations                                                                                      | IDW interpolation                                  | NA              | Low      | ADA24                      | 24.1782 ppbV                    |
| Bentayeb et al. 2015 <sup>47</sup>       | monitoring station observations, model simulation, other auxiliary predictors                                        | universal kriging embedded land use regression     | 2 km            | Good     | 6mDMA8                     | 12.3 µg/m <sup>3</sup>          |
| Crouse et al. 2015 <sup>48</sup>         | monitoring station observations, model simulation                                                                    | linear data assimilation                           | 21 km           | Good     | 6mDMA8                     | 9.5 ppbV                        |
| Tonne et al. 2016 <sup>49</sup>          | KCLurban air dispersion model simulation                                                                             | NA                                                 | 20 m            | Moderate | ADA24                      | 5.3 µg/m <sup>3</sup>           |
| Turner et al. 2016 <sup>50</sup>         | monitoring station observations, CMAQ model simulation                                                               | hierarchical Bayesian space-time data assimilation | 12 km           | High     | ADMA8<br>6mDMA8            | 10 ppbV                         |
| Di et al. 2017 <sup>51</sup>             | monitoring station observations, model simulation, satellite remote sensing observations, other auxiliary predictors | ensemble machine learning                          | 1 km            | High     | 6mDMA8                     | 10 ppbV                         |
| Weichenthal et al. 2017 <sup>52</sup>    | monitoring station observations, model simulation                                                                    | linear data assimilation                           | 21 km           | Good     | 6mDMA8                     | 10.503 ppbV                     |
| Cakmak et al. 2018 <sup>53</sup>         | monitoring station observations, model simulation                                                                    | linear data assimilation                           | 21 km           | Good     | 6mDMA8                     | 10 ppbV                         |
| Hvidtfeldt et al. 2019 <sup>54</sup>     | AirGIS dispersion model simulation                                                                                   | NA                                                 | 1 km            | Moderate | ADA24                      | 10 µg/m <sup>3</sup>            |
| Kazemiparkouhi et al. 2019 <sup>55</sup> | monitoring station observations                                                                                      | nearest matching (assumed)                         | 6 km            | Low      | 6mDMA1<br>6mDMA8<br>6mDA24 | 10 ppbV                         |
| Lim et al. 2019 <sup>56</sup>            | monitoring station observations, CMAQ model simulation                                                               | Bayesian space-time downscaling                    | 12 km           | High     | 6mDMA8                     | 10 ppbV                         |
| Paul et al. 2020 <sup>57</sup>           | monitoring station observations, model simulation                                                                    | linear data assimilation                           | 21 km           | Good     | 6mDMA8                     | 6.4 ppbV                        |
| Shi et al. 2021 <sup>58</sup>            | monitoring station observations, model simulation, satellite remote sensing observations, other auxiliary predictors | ensemble machine learning                          | 1 km            | High     | 6mDMA8                     | 10 ppbV                         |
| Strak et al. 2021 <sup>59</sup>          | monitoring station observations, model simulation, satellite remote sensing observations, other auxiliary predictors | universal kriging embedded land use regression     | 100 m           | High     | 6mDMA8                     | 10 µg/m <sup>3</sup>            |

|                                      |                                                                                                                      |                                                |       |      |        |                      |
|--------------------------------------|----------------------------------------------------------------------------------------------------------------------|------------------------------------------------|-------|------|--------|----------------------|
| Yazdi et al. 2021 <sup>60</sup>      | monitoring station observations, model simulation, satellite remote sensing observations, other auxiliary predictors | ensemble machine learning                      | 1 km  | High | 6mDMA8 | 1 ppbV               |
| Bauwelinck et al. 2022 <sup>61</sup> | monitoring station observations, model simulation, satellite remote sensing observations, other auxiliary predictors | land use regression                            | 100 m | High | 6mDMA8 | 10 µg/m <sup>3</sup> |
| Stafoggia et al. 2022 <sup>62</sup>  | monitoring station observations, model simulation, satellite remote sensing observations, other auxiliary predictors | universal kriging embedded land use regression | 100 m | High | 6mDMA8 | 10 µg/m <sup>3</sup> |

---

<sup>0</sup> NR, not reported.

<sup>†</sup> The statistical methods were not clearly stated in literatures, and thus the most basic method was assumed. The nearest neighbourhood matching shall be the simplest way to assign spatially sparse observations onto cohort participants, and the inverse distance weighting (IDW) is the simplest spatial interpolation approach.

<sup>‡</sup> NA, not applicable. The chemical transport model simulations were directly used for individual exposure assignment without further statistical processing.



**Table 3** Pooled RRs for long-term 10-ppbV incremental O<sub>3</sub>-exposure attributable multi-cause mortalities by 4 most widely used metrics and crude risks without metric harmonisation.

| Mortality causes                                      | 6mDMA8               | 6mDA24               | ADMA8                | ADA24                | Crude                |
|-------------------------------------------------------|----------------------|----------------------|----------------------|----------------------|----------------------|
| All causes ( <i>n</i> = 23)                           | 1.014 (1.009, 1.019) | 1.023 (1.014, 1.032) | 1.016 (1.010, 1.022) | 1.027 (1.017, 1.037) | 1.017 (1.011, 1.023) |
| Respiratory diseases ( <i>n</i> = 16)                 | 1.025 (1.010, 1.040) | 1.042 (1.016, 1.069) | 1.029 (1.011, 1.047) | 1.049 (1.019, 1.081) | 1.031 (1.017, 1.046) |
| Chronic obstructive pulmonary disease ( <i>n</i> = 7) | 1.056 (1.029, 1.084) | 1.098 (1.050, 1.149) | 1.066 (1.034, 1.098) | 1.116 (1.058, 1.176) | 1.055 (1.032, 1.078) |
| Cardiovascular diseases ( <i>n</i> = 15)              | 1.019 (1.004, 1.035) | 1.033 (1.006, 1.061) | 1.022 (1.004, 1.041) | 1.038 (1.007, 1.071) | 1.024 (1.009, 1.038) |
| Ischaemic heart disease ( <i>n</i> = 10)              | 1.012 (0.987, 1.039) | 1.021 (0.977, 1.067) | 1.014 (0.984, 1.045) | 1.024 (0.973, 1.078) | 1.017 (0.994, 1.041) |
| Congestive heart failure ( <i>n</i> = 4)              | 1.074 (1.054, 1.093) | 1.130 (1.094, 1.168) | 1.086 (1.063, 1.110) | 1.155 (1.110, 1.198) | 1.083 (1.059, 1.107) |
| Cerebrovascular diseases ( <i>n</i> = 6)              | 0.993 (0.979, 1.008) | 0.988 (0.964, 1.013) | 0.992 (0.976, 1.009) | 0.986 (0.958, 1.015) | 0.992 (0.979, 1.006) |
| Lung cancer ( <i>n</i> = 12)                          | 0.966 (0.926, 1.007) | 0.943 (0.878, 1.012) | 0.960 (0.915, 1.008) | 0.933 (0.859, 1.014) | 0.960 (0.909, 1.013) |

## FIGURES

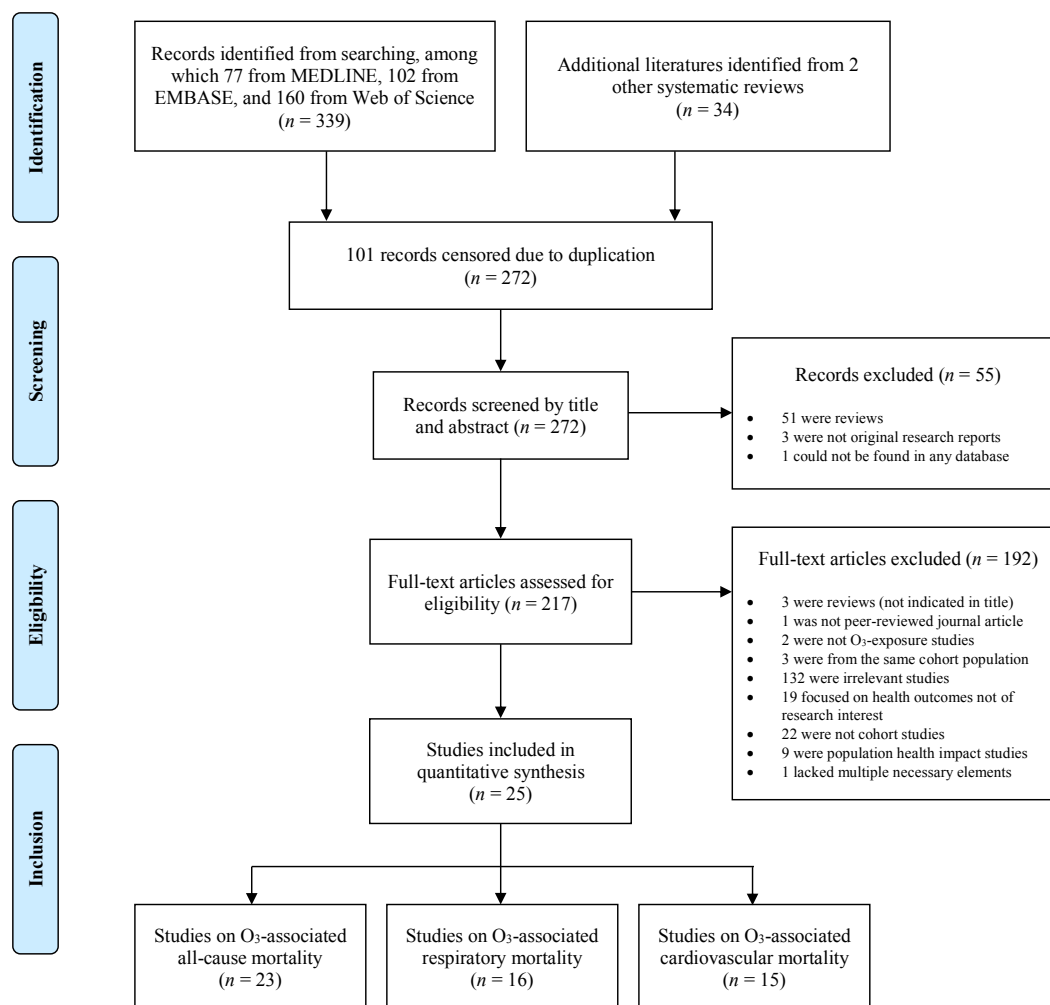

**Figure 1** Schematic flowchart of study assessment and selection processes for literature review and meta-analysis.

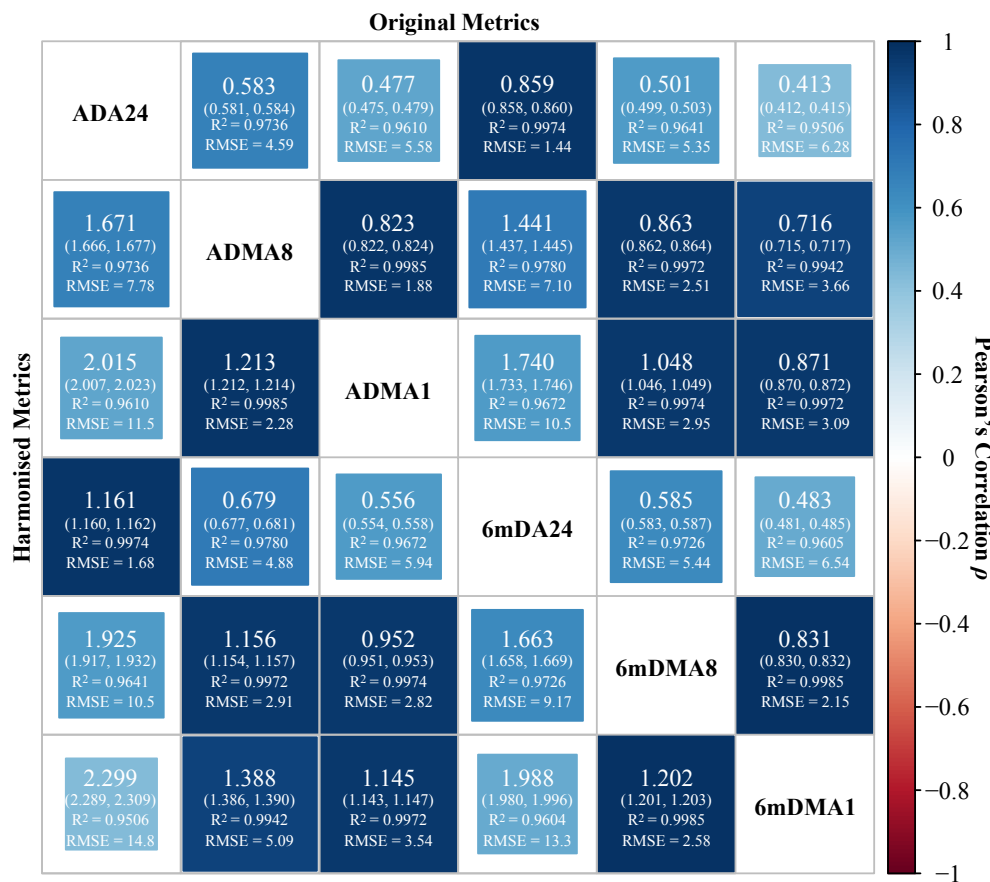

**Figure 2 Cross-metric linear relationships and conversion accuracies.** The cross-metric linear relationships were scaled by Pearson's correlation coefficients. The cross-metric conversion factors with 95% confidence intervals (95% CI) were estimated by non-intercept linear regression models, accompanied with fitting accuracies quantified by coefficient of determination ( $R^2$ ) and root mean square error (RMSE) in ppbV. The conversion factors were defined as multiples from the original metric by column into the target harmonised metric by row, e.g.  $ADMA8 = 1.671 ADA24$ ,  $R^2 = 0.9736$ ,  $RMSE = 7.78$  ppbV. Note that by non-intercept linear regression, the values of  $R^2$  should no longer be equal to the squared Pearson's linear correlation coefficients. As the cross-metric conversion coefficients were estimated statistically, indirect conversions were not recommended, since regression noises restricted the validity of equation  $k_{A \rightarrow B} = k_{A \rightarrow C} \cdot k_{C \rightarrow B}$ .

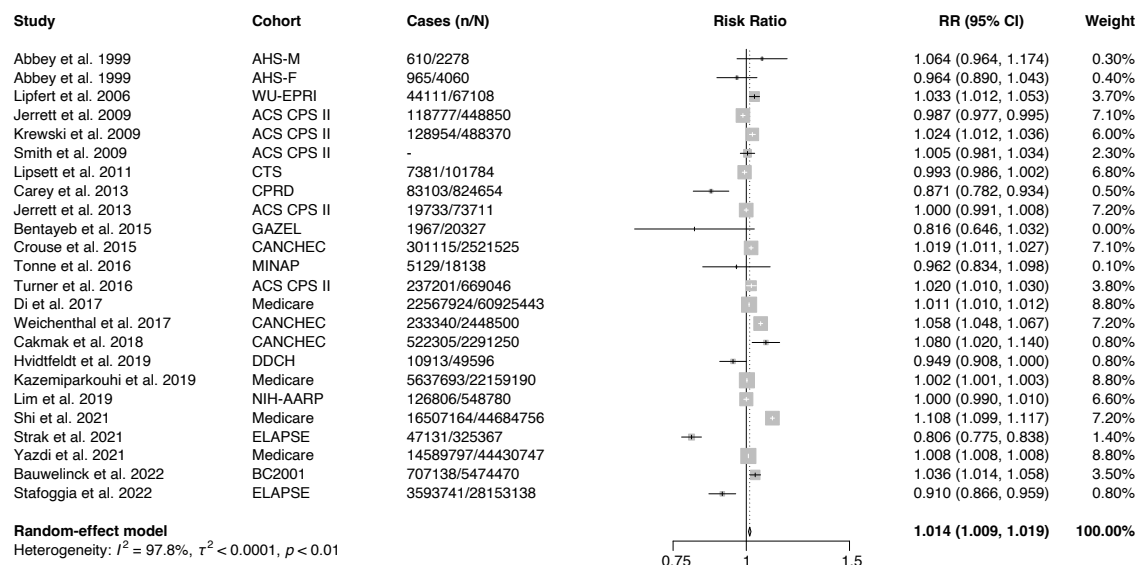

**Figure 3** Pooled estimates of all-cause mortality risk associated with every 10-ppbV incremental O<sub>3</sub> exposure by 6mDMA8 metric. Size of the shaded squares in the forest plot represents the weight of each study estimated by random-effect model.

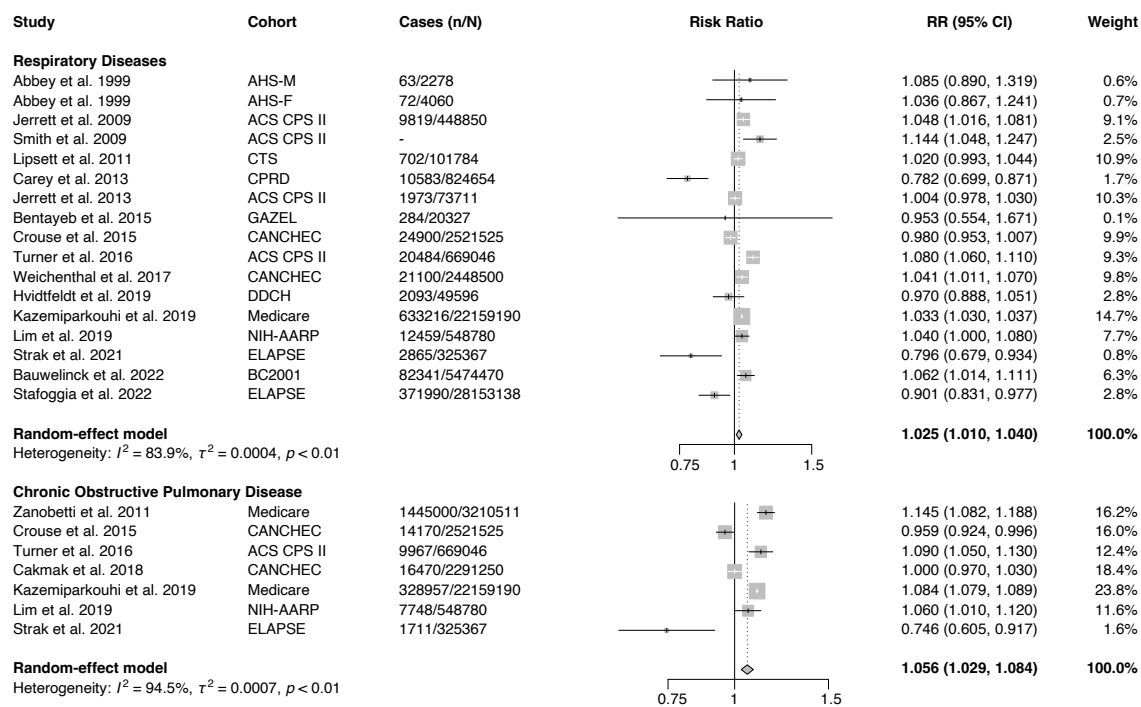

**Figure 4** Pooled estimates of respiratory diseases and COPD mortality risks associated with every 10-ppbV incremental O<sub>3</sub> exposure by 6mDMA8 metric.

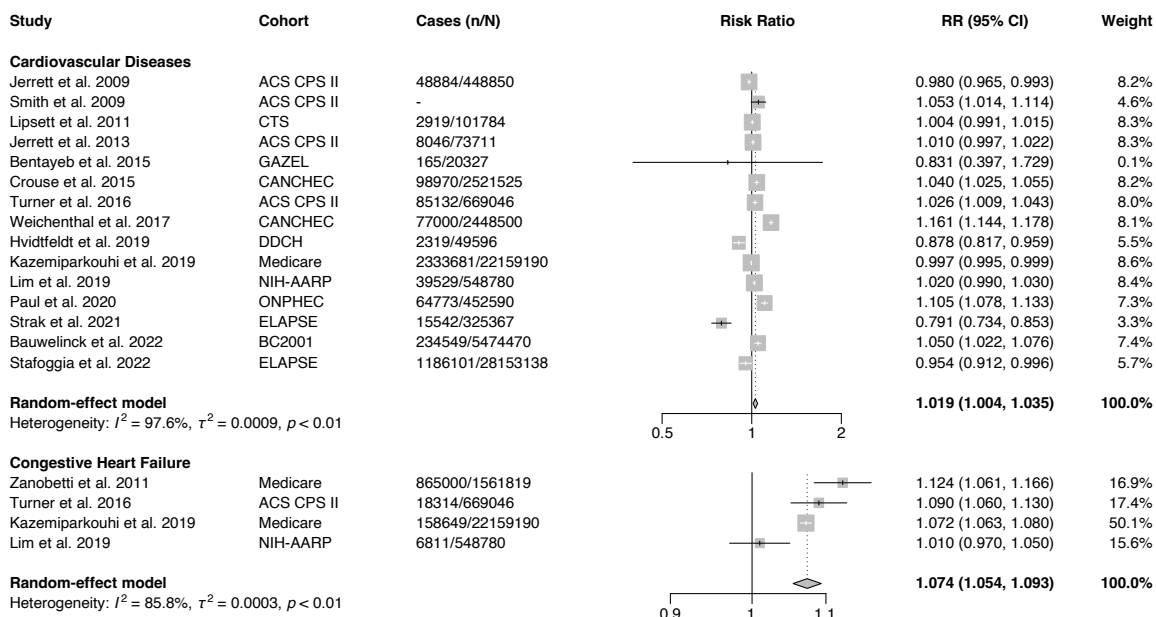

**Figure 5** Pooled estimates of cardiovascular diseases and congestive heart failure mortality risk associated with every 10-ppbV incremental O<sub>3</sub> exposure by 6mDMA8 metric.

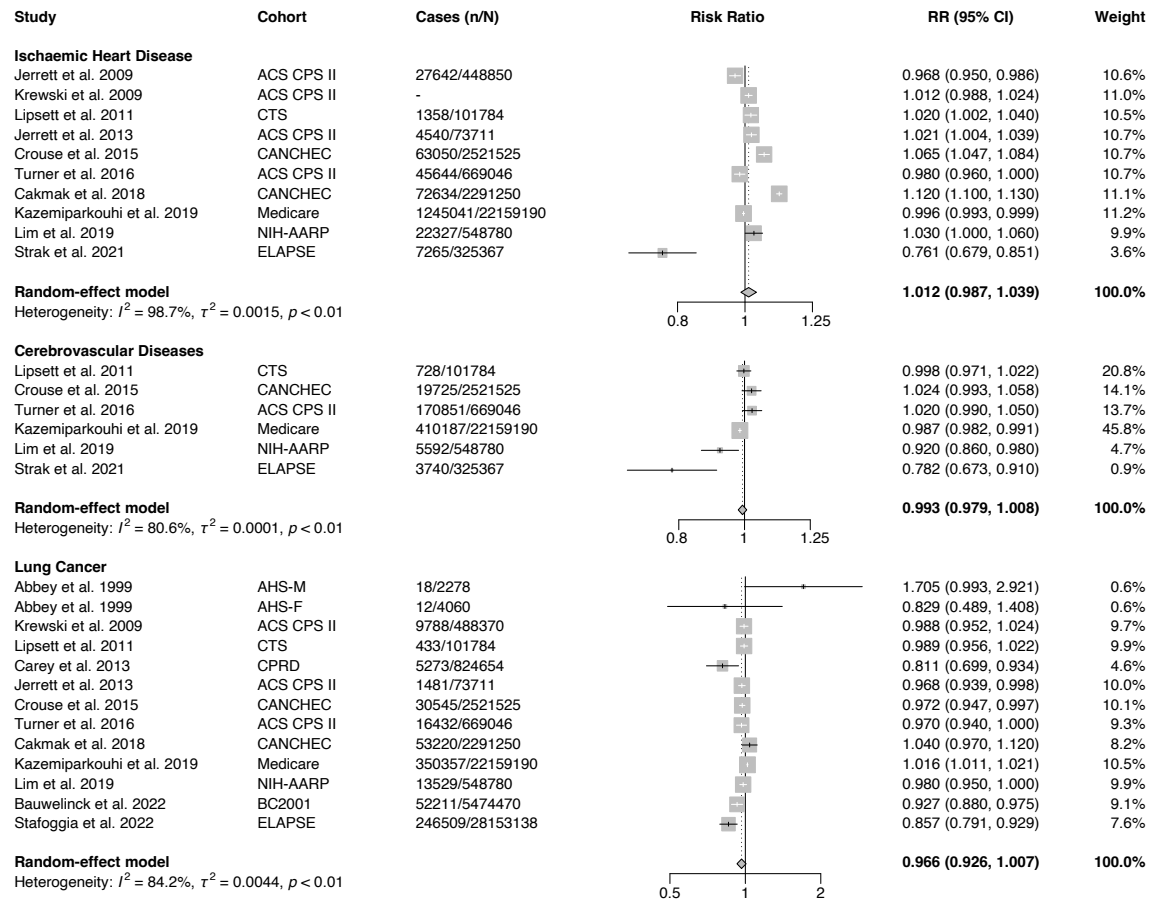

**Figure 6** Pooled estimates of ischaemic heart disease, cerebrovascular diseases, lung cancer, ischaemic stroke, and pneumonia mortality risks associated with every 10-ppbV incremental O<sub>3</sub> exposure by 6mDMA8 metric.

## REFERENCES

1. Fu, B.; Gasser, T.; Li, B.; Tao, S.; Ciaisi, P.; Piao, S.; Balkanski, Y.; Li, W.; Yin, T.; Han, L., Short-lived climate forcers have long-term climate impacts via the carbon-climate feedback. *Nat Clim Change* **2020**, *10*, (9), 851-855.
2. Wilson, S. R.; Madronich, S.; Longstreth, J. D.; Solomon, K. R., Interactive effects of changing stratospheric ozone and climate on tropospheric composition and air quality, and the consequences for human and ecosystem health. *Photochem Photobiol Sci* **2019**, *18*, (3), 775-803.
3. Stolarski, R. S., The Antarctic ozone hole. *Sci Am* **1988**, *258*, (1), 30-37.
4. Ghude, S. D.; Jena, C.; Chate, D. M.; Beig, G.; Pfister, G. G.; Kumar, R.; Ramanathan, V., Reductions in India's crop yield due to ozone. *Geophys Res Lett* **2014**, *41*, (15), 5685-5691.
5. Zhang, F.; Zhang, H.; Wu, C.; Zhang, M.; Feng, H.; Li, D.; Zhu, W., Acute effects of ambient air pollution on clinic visits of college students for upper respiratory tract infection in Wuhan, China. *Environ Sci Pollut Res Int* **2021**, 1-11.
6. Zheng, X.-Y.; Orellano, P.; Lin, H.-L.; Jiang, M.; Guan, W.-J., Short-term exposure to ozone, nitrogen dioxide, and sulphur dioxide and emergency department visits and hospital admissions due to asthma: A systematic review and meta-analysis. *Environ Int* **2021**, *150*, 106435.
7. Liu, Y.; Pan, J.; Fan, C.; Xu, R.; Wang, Y.; Xu, C.; Xie, S.; Zhang, H.; Cui, X.; Peng, Z.; Shi, C.; Zhang, Y.; Sun, H.; Zhou, Y.; Zhang, L., Short-Term Exposure to Ambient Air Pollution and Mortality From Myocardial Infarction. *J Am Coll Cardiol* **2021**, *77*, (3), 271-281.
8. Zhao, R.; Chen, S.; Wang, W.; Huang, J.; Wang, K.; Liu, L.; Wei, S., The impact of short-term exposure to air pollutants on the onset of out-of-hospital cardiac arrest: A systematic review and meta-analysis. *Int J Cardiol* **2017**, *226*, 110-117.
9. Han, C.; Lu, Y.; Cheng, H.; Wang, C.; Chan, P., The impact of long-term exposure to ambient air pollution and second-hand smoke on the onset of Parkinson disease: a review and meta-analysis. *Public Health* **2020**, *179*, 100-110.
10. Li, J.; Huang, J.; Cao, R.; Yin, P.; Wang, L.; Liu, Y.; Pan, X.; Li, G.; Zhou, M., The association between ozone and years of life lost from stroke, 2013-2017: A retrospective regression analysis in 48 major Chinese cities. *J Hazard Mater* **2021**, *405*, 124220.
11. Liu, G.; Sun, B.; Yu, L.; Chen, J.; Han, B.; Li, Y.; Chen, J., The Gender-Based Differences in Vulnerability to Ambient Air Pollution and Cerebrovascular Disease Mortality: Evidences Based on 26781 Deaths. *Glob Heart* **2020**, *15*, (1), 46.
12. Sun, Z.; Yang, L.; Bai, X.; Du, W.; Shen, G.; Fei, J.; Wang, Y.; Chen, A.; Chen, Y.; Zhao, M., Maternal ambient air pollution exposure with spatial-temporal variations and preterm birth risk assessment during 2013-2017 in Zhejiang Province, China. *Environ Int* **2019**, *133*, (Pt B), 105242.
13. Global Burden of Disease Collaborative Network, Global Burden of Disease Study 2019 (GBD 2019) Results. In Institute for Health Metrics and Evaluation (IHME): Seattle, United States, 2020.
14. Niu, Z.; Liu, F.; Yu, H.; Wu, S.; Xiang, H., Association between exposure to ambient air pollution and hospital admission, incidence, and mortality of stroke: an updated systematic review and meta-analysis of more than 23 million participants. *Environ Health Prev Med* **2021**, *26*, (1), 1-14.
15. Huangfu, P.; Atkinson, R., Long-term exposure to NO<sub>2</sub> and O<sub>3</sub> and all-cause and respiratory mortality: A systematic review and meta-analysis. *Environ Int* **2020**, *144*, 105998.
16. Atkinson, R. W.; Butland, B. K.; Dimitroulopoulou, C.; Heal, M. R.; Stedman, J. R.; Carslaw, N.; Jarvis, D.; Heaviside, C.; Vardoulakis, S.; Walton, H.; Anderson, H. R., Long-term exposure to ambient ozone and mortality: a quantitative systematic review and meta-analysis of evidence from cohort studies. *BMJ Open* **2016**, *6*, (2), e009493.



17. Shen, H.; Sun, Z.; Chen, Y.; Russell, A. G.; Hu, Y.; Odman, M. T.; Qian, Y.; Archibald, A. T.; Tao, S., Novel Method for Ozone Isopleth Construction and Diagnosis for the Ozone Control Strategy of Chinese Cities. *Environ Sci Technol* **2021**, *55*, (23), 15625-15636.
18. Sun, Z.; Archibald, A. T., Multi-stage Ensemble-learning-based Model Fusion for Surface Ozone Simulations: A Focus on CMIP6 Models. *Environmental Science and Ecotechnology* **2021**, *8*, 100124.
19. Schultz, M. G.; Schroder, S.; Lyapina, O.; Cooper, O. R.; Galbally, I.; Petropavlovskikh, I.; von Schneidmesser, E.; Tanimoto, H.; Elshorbany, Y.; Naja, M.; Seguel, R. J.; Dauert, U.; Eckhardt, P.; Feigenspan, S.; Fiebig, M.; Hjellbrekke, A. G.; Hong, Y. D.; Kjeld, P. C.; Koide, H.; Lear, G.; Tarasick, D.; Ueno, M.; Wallasch, M.; Baumgardner, D.; Chuang, M. T.; Gillett, R.; Lee, M.; Molloy, S.; Moolla, R.; Wang, T.; Sharps, K.; Adame, J. A.; Ancellet, G.; Apadula, F.; Artaxo, P.; Barlasina, M. E.; Bogucka, M.; Bonasoni, P.; Chang, L.; Colomb, A.; Cuevas-Agullo, E.; Cupeiro, M.; Degorska, A.; Ding, A. J.; FrHlich, M.; Frolova, M.; Gadhavi, H.; Gheusi, F.; Gilge, S.; Gonzalez, M. Y.; Gros, V.; Hamad, S. H.; Helmig, D.; Henriques, D.; Hermansen, O.; Holla, R.; Hueber, J.; Im, U.; Jaffe, D. A.; Komala, N.; Kubistin, D.; Lam, K. S.; Laurila, T.; Lee, H.; Levy, I.; Mazzoleni, C.; Mazzoleni, L. R.; McClure-Begley, A.; Mohamad, M.; Murovec, M.; Navarro-Comas, M.; Nicodim, F.; Parrish, D.; Read, K. A.; Reid, N.; Ries, N. R. L.; Saxena, P.; Schwab, J. J.; Scorgie, Y.; Senik, I.; Simmonds, P.; Sinha, V.; Skorokhod, A. I.; Spain, G.; Spangl, W.; Spoor, R.; Springston, S. R.; Steer, K.; Steinbacher, M.; Suharguniyawan, E.; Torre, P.; Trickl, T.; Lin, W. L.; Weller, R.; Xu, X. B.; Xue, L. K.; Ma, Z. Q., Tropospheric Ozone Assessment Report: Database and metrics data of global surface ozone observations. *Elem Sci Anth* **2017**, *5*, 58-83.
20. Institute for Health Metrics and Evaluation (IHME), GBD 2019 Cause and Risk Summary: Ambient Ozone Pollution. In IHME, University of Washington: Seattle, USA, 2020.
21. Guyatt, G. H.; Oxman, A. D.; Vist, G. E.; Kunz, R.; Falck-Ytter, Y.; Alonso-Coello, P.; Schunemann, H. J.; Group, G. W., GRADE: an emerging consensus on rating quality of evidence and strength of recommendations. *BMJ* **2008**, *336*, (7650), 924-6.
22. Guyatt, G.; Oxman, A. D.; Akl, E. A.; Kunz, R.; Vist, G.; Brozek, J.; Norris, S.; Falck-Ytter, Y.; Glasziou, P.; DeBeer, H.; Jaeschke, R.; Rind, D.; Meerpohl, J.; Dahm, P.; Schunemann, H. J., GRADE guidelines: 1. Introduction-GRADE evidence profiles and summary of findings tables. *J Clin Epidemiol* **2011**, *64*, (4), 383-94.
23. Egger, M.; Davey Smith, G.; Schneider, M.; Minder, C., Bias in meta-analysis detected by a simple, graphical test. *BMJ* **1997**, *315*, (7109), 629-34.
24. Duval, S.; Tweedie, R., A nonparametric "trim and fill" method of accounting for publication bias in meta-analysis. *J Am Stat Assoc* **2000**, *95*, (449), 89-98.
25. Sun, H. Z.; Shin, Y. M.; Xia, M.; Ke, S.; Yuan, L.; Guo, Y.; Archibald, A. T., Spatial Resolved Surface Ozone with Urban and Rural Differentiation during 1990-2019: A Space-time Bayesian Neural Network Downscaler. *Environ Sci Technol* **2021**.
26. Krupa, S.; McGrath, M. T.; Andersen, C. P.; Booker, F. L.; Burkey, K. O.; Chappelka, A. H.; Chevone, B. I.; Pell, E. J.; Zilinskas, B. A., Ambient Ozone and Plant Health. *Plant Dis* **2001**, *85*, (1), 4-12.
27. Finlayson-Pitts, B.; Pitts Jr, J., Atmospheric chemistry of tropospheric ozone formation: scientific and regulatory implications. *Air & Waste* **1993**, *43*, (8), 1091-1100.
28. Fleming, Z. L.; Doherty, R. M.; Von Schneidmesser, E.; Malley, C. S.; Cooper, O. R.; Pinto, J. P.; Colette, A.; Xu, X.; Simpson, D.; Schultz, M. G.; Lefohn, A. S.; Hamad, S.; Moolla, R.; Solberg, S.; Feng, Z., Tropospheric Ozone Assessment Report: Present-day ozone distribution and trends relevant to human health. *Elem Sci Anth* **2018**, *6*, 12.
29. Griffiths, P. T.; Murray, L. T.; Zeng, G.; Archibald, A. T.; Emmons, L. K.; Galbally, I.; Hassler, B.; Horowitz, L. W.; Keeble, J.; Liu, J.; Moeini, O.; Naik, V.; amp; apos; Connor, F. M.; Shin, Y. M.; Tarasick, D.; Tilmes, S.; Turnock, S. T.; Wild, O.; Young, P. J.; Zanis, P., Tropospheric ozone in CMIP6 Simulations. *Atmos Chem Phys* **2021**, *21*, (5), 4187-4218.
30. Archibald, A. T.; O'Connor, F. M.; Abraham, N. L.; Archer-Nicholls, S.; Chipperfield, M. P.; Dalvi, M.; Folberth, G. A.; Dennison, F.; Dhomse, S. S.; Griffiths, P. T.; Hardacre, C.; Hewitt, A. J.; Hill, R.; Johnson, C. E.; Keeble, J.; Köhler, M. O.; Morgenstern, O.; Mulchay, J. P.; Ordóñez, C.; Pope, R. J.;

- Rumbold, S.; Russo, M. R.; Savage, N.; Sellar, A.; Stringer, M.; Turnock, S.; Wild, O.; Zeng, G., Description and evaluation of the UKCA stratosphere-troposphere chemistry scheme (StratTrop vn 1.0) implemented in UKESM1. *Geosci Model Dev* **2019**, *13*, (3), 1223-1266.
31. Tong, L.; Zhang, H.; Yu, J.; He, M.; Xu, N.; Zhang, J.; Qian, F.; Feng, J.; Xiao, H., Characteristics of surface ozone and nitrogen oxides at urban, suburban and rural sites in Ningbo, China. *Atmos Res* **2017**, *187*, 57-68.
  32. U.S. EPA *Air Quality Criteria For Ozone and Related Photochemical Oxidants (Final Report, 2006)*; U.S. Environmental Protection Agency: Washington, DC, 2006.
  33. Tarasick, D.; Galbally, I. E.; Cooper, O. R.; Schultz, M. G.; Ancellet, G.; Leblanc, T.; Wallington, T. J.; Ziemke, J.; Liu, X.; Steinbacher, M.; Staehelin, J.; Vigouroux, C.; Hannigan, J. W.; Garcia, O.; Foret, G.; Zanis, P.; Weatherhead, E.; Petropavlovskikh, I.; Worden, H.; Osman, M.; Liu, J.; Chang, K. L.; Gaudel, A.; Lin, M. Y.; Granados-Munoz, M.; Thompson, A. M.; Oltmans, S. J.; Cuesta, J.; Dufour, G.; Thouret, V.; Hassler, B.; Trickl, T.; Neu, J. L., Tropospheric Ozone Assessment Report: Tropospheric ozone from 1877 to 2016, observed levels, trends and uncertainties. *Elem Sci Anth* **2019**, *7*, 39.
  34. Lu, X.; Hong, J. Y.; Zhang, L.; Cooper, O. R.; Schultz, M. G.; Xu, X. B.; Wang, T.; Gao, M.; Zhao, Y. H.; Zhang, Y. H., Severe Surface Ozone Pollution in China: A Global Perspective. *Environ Sci Technol Lett* **2018**, *5*, (8), 487-494.
  35. Hunter, J. E.; Schmidt, F. L., Meta-analysis. In *Advances in educational and psychological testing: Theory and applications*, Springer: 1991; pp 157-183.
  36. Higgins, J. P.; Thompson, S. G.; Deeks, J. J.; Altman, D. G., Measuring inconsistency in meta-analyses. *BMJ* **2003**, *327*, (7414), 557-60.
  37. Burnett, R. T.; Pope, C. A., 3<sup>rd</sup>; Ezzati, M.; Olives, C.; Lim, S. S.; Mehta, S.; Shin, H. H.; Singh, G.; Hubbell, B.; Brauer, M.; Anderson, H. R.; Smith, K. R.; Balmes, J. R.; Bruce, N. G.; Kan, H.; Laden, F.; Pruss-Ustun, A.; Turner, M. C.; Gapstur, S. M.; Diver, W. R.; Cohen, A., An integrated risk function for estimating the global burden of disease attributable to ambient fine particulate matter exposure. *Environ Health Perspect* **2014**, *122*, (4), 397-403.
  38. Abbey, D. E.; Nishino, N.; McDonnell, W. F.; Burchette, R. J.; Knutsen, S. F.; Lawrence Beeson, W.; Yang, J. X., Long-term inhalable particles and other air pollutants related to mortality in nonsmokers. *Am J Respir Crit Care Med* **1999**, *159*, (2), 373-82.
  39. Lipfert, F. W.; Wyzga, R. E.; Baty, J. D.; Miller, J. P., Traffic density as a surrogate measure of environmental exposures in studies of air pollution health effects: Long-term mortality in a cohort of US veterans. *Atmos Environ* **2006**, *40*, (1), 154-169.
  40. Jerrett, M.; Burnett, R. T.; Pope, C. A., 3<sup>rd</sup>; Ito, K.; Thurston, G.; Krewski, D.; Shi, Y.; Calle, E.; Thun, M., Long-term ozone exposure and mortality. *N Engl J Med* **2009**, *360*, (11), 1085-95.
  41. Krewski, D.; Jerrett, M.; Burnett, R. T.; Ma, R.; Hughes, E.; Shi, Y.; Turner, M. C.; Pope III, C. A.; Thurston, G.; Calle, E. E., *Extended follow-up and spatial analysis of the American Cancer Society study linking particulate air pollution and mortality*. Health Effects Institute Boston, MA: 2009.
  42. Smith, K. R.; Jerrett, M.; Anderson, H. R.; Burnett, R. T.; Stone, V.; Derwent, R.; Atkinson, R. W.; Cohen, A.; Shonkoff, S. B.; Krewski, D.; Pope, C. A., 3<sup>rd</sup>; Thun, M. J.; Thurston, G., Public health benefits of strategies to reduce greenhouse-gas emissions: health implications of short-lived greenhouse pollutants. *Lancet* **2009**, *374*, (9707), 2091-2103.
  43. Lipsett, M. J.; Ostro, B. D.; Reynolds, P.; Goldberg, D.; Hertz, A.; Jerrett, M.; Smith, D. F.; Garcia, C.; Chang, E. T.; Bernstein, L., Long-term exposure to air pollution and cardiorespiratory disease in the California teachers study cohort. *Am J Respir Crit Care Med* **2011**, *184*, (7), 828-35.
  44. Zanobetti, A.; Schwartz, J., Ozone and survival in four cohorts with potentially predisposing diseases. *Am J Respir Crit Care Med* **2011**, *184*, (7), 836-41.
  45. Carey, I. M.; Atkinson, R. W.; Kent, A. J.; van Staa, T.; Cook, D. G.; Anderson, H. R., Mortality associations with long-term exposure to outdoor air pollution in a national English cohort. *Am J Respir Crit Care Med* **2013**, *187*, (11), 1226-33.

46. Jerrett, M.; Burnett, R. T.; Beckerman, B. S.; Turner, M. C.; Krewski, D.; Thurston, G.; Martin, R. V.; van Donkelaar, A.; Hughes, E.; Shi, Y.; Gapstur, S. M.; Thun, M. J.; Pope, C. A., 3<sup>rd</sup>, Spatial analysis of air pollution and mortality in California. *Am J Respir Crit Care Med* **2013**, *188*, (5), 593-9.
47. Bentayeb, M.; Wagner, V.; Stempfelet, M.; Zins, M.; Goldberg, M.; Pascal, M.; Larrieu, S.; Beaudreau, P.; Cassadou, S.; Eilstein, D., Association between long-term exposure to air pollution and mortality in France: a 25-year follow-up study. *Environ Int* **2015**, *85*, 5-14.
48. Crouse, D. L.; Peters, P. A.; Hystad, P.; Brook, J. R.; van Donkelaar, A.; Martin, R. V.; Villeneuve, P. J.; Jerrett, M.; Goldberg, M. S.; Pope III, C. A., Ambient PM<sub>2.5</sub>, O<sub>3</sub>, and NO<sub>2</sub> exposures and associations with mortality over 16 years of follow-up in the Canadian Census Health and Environment Cohort (CanCHEC). *Environ Health Perspect* **2015**, *123*, (11), 1180-1186.
49. Tonne, C.; Halonen, J. I.; Beevers, S. D.; Dajnak, D.; Gulliver, J.; Kelly, F. J.; Wilkinson, P.; Anderson, H. R., Long-term traffic air and noise pollution in relation to mortality and hospital readmission among myocardial infarction survivors. *Int J Hyg Environ Health* **2016**, *219*, (1), 72-78.
50. Turner, M. C.; Jerrett, M.; Pope, C. A., 3<sup>rd</sup>; Krewski, D.; Gapstur, S. M.; Diver, W. R.; Beckerman, B. S.; Marshall, J. D.; Su, J.; Crouse, D. L.; Burnett, R. T., Long-Term Ozone Exposure and Mortality in a Large Prospective Study. *Am J Respir Crit Care Med* **2016**, *193*, (10), 1134-42.
51. Di, Q.; Wang, Y.; Zanobetti, A.; Wang, Y.; Koutrakis, P.; Choirat, C.; Dominici, F.; Schwartz, J. D., Air Pollution and Mortality in the Medicare Population. *N Engl J Med* **2017**, *376*, (26), 2513-2522.
52. Weichenthal, S.; Pinault, L. L.; Burnett, R. T., Impact of oxidant gases on the relationship between outdoor fine particulate air pollution and nonaccidental, cardiovascular, and respiratory mortality. *Sci Rep* **2017**, *7*, (1), 1-10.
53. Cakmak, S.; Hebborn, C.; Pinault, L.; Lavigne, E.; Vanos, J.; Crouse, D. L.; Tjepkema, M., Associations between long-term PM<sub>2.5</sub> and ozone exposure and mortality in the Canadian Census Health and Environment Cohort (CANCHEC), by spatial synoptic classification zone. *Environ Int* **2018**, *111*, 200-211.
54. Hvidtfeldt, U. A.; Sorensen, M.; Geels, C.; Ketzel, M.; Khan, J.; Tjonneland, A.; Overvad, K.; Brandt, J.; Raaschou-Nielsen, O., Long-term residential exposure to PM<sub>2.5</sub>, PM<sub>10</sub>, black carbon, NO<sub>2</sub>, and ozone and mortality in a Danish cohort. *Environ Int* **2019**, *123*, 265-272.
55. Kazemiparkouhi, F.; Eum, K. D.; Wang, B.; Manjourides, J.; Suh, H. H., Long-term ozone exposures and cause-specific mortality in a US Medicare cohort. *J Expo Sci Environ Epidemiol* **2020**, *30*, (4), 650-658.
56. Lim, C. C.; Hayes, R. B.; Ahn, J.; Shao, Y.; Silverman, D. T.; Jones, R. R.; Garcia, C.; Bell, M. L.; Thurston, G. D., Long-Term Exposure to Ozone and Cause-Specific Mortality Risk in the United States. *Am J Respir Crit Care Med* **2019**, *200*, (8), 1022-1031.
57. Paul, L. A.; Burnett, R. T.; Kwong, J. C.; Hystad, P.; van Donkelaar, A.; Bai, L.; Goldberg, M. S.; Lavigne, E.; Copes, R.; Martin, R. V., The impact of air pollution on the incidence of diabetes and survival among prevalent diabetes cases. *Environ Int* **2020**, *134*, 105333.
58. Shi, L.; Rosenberg, A.; Wang, Y.; Liu, P.; Danesh Yazdi, M.; Requia, W.; Steenland, K.; Chang, H.; Sarnat, J. A.; Wang, W.; Zhang, K.; Zhao, J.; Schwartz, J., Low-Concentration Air Pollution and Mortality in American Older Adults: A National Cohort Analysis (2001-2017). *Environ Sci Technol* **2021**.
59. Strak, M.; Weinmayr, G.; Rodopoulou, S.; Chen, J.; de Hoogh, K.; Andersen, Z. J.; Atkinson, R.; Bauwelinck, M.; Bekkevold, T.; Bellander, T.; Boutron-Ruault, M. C.; Brandt, J.; Cesaroni, G.; Concini, H.; Fecht, D.; Forastiere, F.; Gulliver, J.; Hertel, O.; Hoffmann, B.; Hvidtfeldt, U. A.; Janssen, N. A. H.; Jockel, K. H.; Jorgensen, J. T.; Ketzel, M.; Klompaker, J. O.; Lager, A.; Leander, K.; Liu, S.; Ljungman, P.; Magnusson, P. K. E.; Mehta, A. J.; Nagel, G.; Oftedal, B.; Pershagen, G.; Peters, A.; Raaschou-Nielsen, O.; Renzi, M.; Rizzuto, D.; van der Schouw, Y. T.; Schramm, S.; Severi, G.; Sigsgaard, T.; Sorensen, M.; Stafoggia, M.; Tjonneland, A.; Verschuren, W. M. M.; Vienneau, D.; Wolf, K.; Katsouyanni, K.; Brunekreef, B.; Hoek, G.; Samoli, E., Long term exposure to low level air pollution and mortality in eight European cohorts within the ELAPSE project: pooled analysis. *BMJ* **2021**, *374*.

60. Yazdi, M. D.; Wang, Y.; Di, Q.; Requia, W. J.; Wei, Y. G.; Shi, L. H.; Sabath, M. B.; Dominici, F.; Coull, B.; Evans, J. S.; Koutrakis, P.; Schwartz, J. D., Long-term effect of exposure to lower concentrations of air pollution on mortality among US Medicare participants and vulnerable subgroups: a doubly-robust approach. *Lancet Planet Health* **2021**, *5*, (10), E689-E697.
61. Bauwelinck, M.; Chen, J.; de Hoogh, K.; Katsouyanni, K.; Rodopoulou, S.; Samoli, E.; Andersen, Z. J.; Atkinson, R.; Casas, L.; Deboosere, P.; Demoury, C.; Janssen, N.; Klompmaker, J. O.; Lefebvre, W.; Mehta, A. J.; Nawrot, T. S.; Oftedal, B.; Renzi, M.; Stafoggia, M.; Strak, M.; Vandenheede, H.; Vanpoucke, C.; Van Nieuwenhuysse, A.; Vienneau, D.; Brunekreef, B.; Hoek, G., Variability in the association between long-term exposure to ambient air pollution and mortality by exposure assessment method and covariate adjustment: A census-based country-wide cohort study. *Sci Total Environ* **2022**, *804*, 150091.
62. Stafoggia, M.; Oftedal, B.; Chen, J.; Rodopoulou, S.; Renzi, M.; Atkinson, R. W.; Bauwelinck, M.; Klompmaker, J. O.; Mehta, A.; Vienneau, D., Long-term exposure to low ambient air pollution concentrations and mortality among 28 million people: results from seven large European cohorts within the ELAPSE project. *Lancet Planet Health* **2022**, *6*, (1), e9-e18.
63. Hvidtfeldt, U. A.; Geels, C.; Sørensen, M.; Ketzler, M.; Khan, J.; Tjønneland, A.; Christensen, J. H.; Brandt, J.; Raaschou-Nielsen, O., Long-term residential exposure to PM<sub>2.5</sub> constituents and mortality in a Danish cohort. *Environ Int* **2019**, *133*, (Pt B), 105268.
64. Holtzman, M. J.; Cunningham, J. H.; Sheller, J. R.; Irsigler, G. B.; Nadel, J. A.; Boushey, H. A., Effect of ozone on bronchial reactivity in atopic and nonatopic subjects. *Am Rev Respir Dis* **1979**, *120*, (5), 1059-67.
65. Kodavanti, U. P.; Schladweiler, M. C.; Ledbetter, A. D.; Watkinson, W. P.; Campen, M. J.; Winsett, D. W.; Richards, J. R.; Crissman, K. M.; Hatch, G. E.; Costa, D. L., The spontaneously hypertensive rat as a model of human cardiovascular disease: Evidence of exacerbated cardiopulmonary injury and oxidative stress from inhaled emission particulate matter. *Toxicol Appl Pharmacol* **2000**, *164*, (3), 250-263.
66. Wang, M.; Sampson, P. D.; Sheppard, L. E.; Stein, J. H.; Vedal, S.; Kaufman, J. D., Long-Term Exposure to Ambient Ozone and Progression of Subclinical Arterial Disease: The Multi-Ethnic Study of Atherosclerosis and Air Pollution. *Environ Health Perspect* **2019**, *127*, (5), 57001.
67. Whyand, T.; Hurst, J. R.; Beckles, M.; Caplin, M. E., Pollution and respiratory disease: can diet or supplements help? A review. *Respir Res* **2018**, *19*, (1), 79.
68. EPA *Integrated Science Assessment (ISA) for Particulate Matter*; Washington, D.C., 2019.
69. World Health Organization, *WHO global air quality guidelines: particulate matter (PM<sub>2.5</sub> and PM<sub>10</sub>), ozone, nitrogen dioxide, sulfur dioxide and carbon monoxide: Executive summary*. 2021.
70. Pope III, C. A.; Cohen, A. J.; Burnett, R. T., Cardiovascular disease and fine particulate matter: lessons and limitations of an integrated exposure-response approach. *Circ Res* **2018**, *122*, (12), 1645-1647.
71. Fantke, P.; McKone, T. E.; Tainio, M.; Jolliet, O.; Apte, J. S.; Stylianou, K. S.; Illner, N.; Marshall, J. D.; Choma, E. F.; Evans, J. S., Global effect factors for exposure to fine particulate matter. *Environ Sci Technol* **2019**, *53*, (12), 6855-6868.
72. Yin, P.; Brauer, M.; Cohen, A.; Burnett, R. T.; Liu, J.; Liu, Y.; Liang, R.; Wang, W.; Qi, J.; Wang, L.; Zhou, M., Long-term Fine Particulate Matter Exposure and Nonaccidental and Cause-specific Mortality in a Large National Cohort of Chinese Men. *Environ Health Perspect* **2017**, *125*, (11), 117002.
73. Malley, C. S.; Henze, D. K.; Kuylenstierna, J. C. I.; Vallack, H. W.; Davila, Y.; Anenberg, S. C.; Turner, M. C.; Ashmore, M. R., Updated Global Estimates of Respiratory Mortality in Adults  $\geq$  30 Years of Age Attributable to Long-Term Ozone Exposure. *Environ Health Perspect* **2017**, *125*, (8), 087021.
74. Anenberg, S. C.; Horowitz, L. W.; Tong, D. Q.; West, J. J., An estimate of the global burden of anthropogenic ozone and fine particulate matter on premature human mortality using atmospheric modeling. *Environ Health Perspect* **2010**, *118*, (9), 1189-1195.
75. Fann, N.; Lamson, A. D.; Anenberg, S. C.; Wesson, K.; Risley, D.; Hubbell, B. J., Estimating the

national public health burden associated with exposure to ambient PM<sub>2.5</sub> and ozone. *Risk Anal* **2012**, 32, (1), 81-95.

76. Silva, R. A.; West, J. J.; Zhang, Y.; Anenberg, S. C.; Lamarque, J.-F.; Shindell, D. T.; Collins, W. J.; Dalsoren, S.; Faluvegi, G.; Folberth, G., Global premature mortality due to anthropogenic outdoor air pollution and the contribution of past climate change. *Environ Res Lett* **2013**, 8, (3), 034005.
77. West, J. J.; Smith, S. J.; Silva, R. A.; Naik, V.; Zhang, Y.; Adelman, Z.; Fry, M. M.; Anenberg, S.; Horowitz, L. W.; Lamarque, J.-F., Co-benefits of mitigating global greenhouse gas emissions for future air quality and human health. *Nat Clim Change* **2013**, 3, (10), 885-889.
78. Yu, P.; Guo, S.; Xu, R.; Ye, T.; Li, S.; Sim, M.; Abramson, M. J.; Guo, Y., Cohort studies of long-term exposure to outdoor particulate matter and risks of cancer: A systematic review and meta-analysis. *The Innovation* **2021**, 100143.
79. Meng, X.; Liu, C.; Chen, R.; Sera, F.; Vicedo-Cabrera, A. M.; Milojevic, A.; Guo, Y.; Tong, S.; Coelho, M.; Saldiva, P. H. N.; Lavigne, E.; Correa, P. M.; Ortega, N. V.; Osorio, S.; Garcia, Kysely, J.; Urban, A.; Orru, H.; Maasikmets, M.; Jaakkola, J. J. K.; Ryti, N.; Huber, V.; Schneider, A.; Katsouyanni, K.; Analitis, A.; Hashizume, M.; Honda, Y.; Ng, C. F. S.; Nunes, B.; Teixeira, J. P.; Holobaca, I. H.; Fratianni, S.; Kim, H.; Tobias, A.; Iniguez, C.; Forsberg, B.; Astrom, C.; Ragetti, M. S.; Guo, Y. L.; Pan, S. C.; Li, S.; Bell, M. L.; Zanobetti, A.; Schwartz, J.; Wu, T.; Gasparrini, A.; Kan, H., Short term associations of ambient nitrogen dioxide with daily total, cardiovascular, and respiratory mortality: multilocation analysis in 398 cities. *BMJ* **2021**, 372, n534.
80. Yu, K.; Lv, J.; Qiu, G.; Yu, C.; Guo, Y.; Bian, Z.; Yang, L.; Chen, Y.; Wang, C.; Pan, A.; Liang, L.; Hu, F. B.; Chen, Z.; Li, L.; Wu, T.; China Kadoorie Biobank, S., Cooking fuels and risk of all-cause and cardiopulmonary mortality in urban China: a prospective cohort study. *Lancet Glob Health* **2020**, 8, (3), e430-e439.
